# Supplementary material for: Derivation of consensus inactivation status for X-linked genes from genome-wide studies
Source: Springer Nature journal article supplement (doi:10.1186/s13293-015-0053-7), 2015-12-01

A)

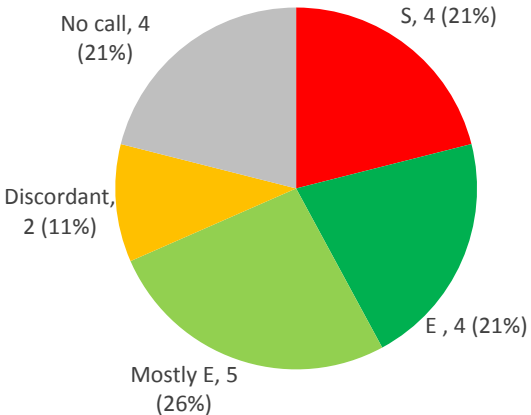

B)

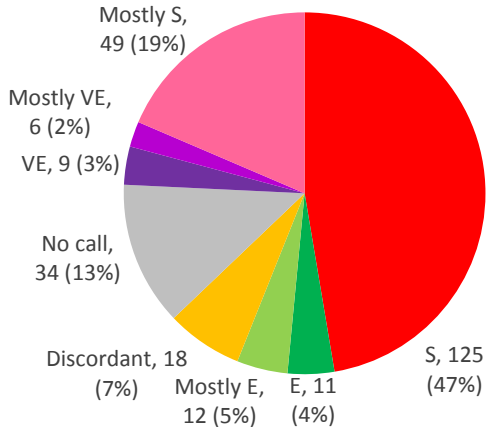

Supplement: 13293_2015_53_MOESM7_ESM.pdf [file 13293_2015_53_MOESM7_ESM.pdf]
