# Supplementary material for: Derivation of consensus inactivation status for X-linked genes from genome-wide studies
Source: Biol Sex Differ. 2015 Dec 30;6:35. doi: 10.1186/s13293-015-0053-7 (PMC4696107; doi:10.1186/s13293-015-0053-7)
Supplement: Additional file 1: Table S1. — Our consensus XCI status calls for all genes on the X chromosome. The consensus calls from this study are under the column labeled Balaton consensus calls. The data used for the rest of the analyses in this article are also included as columns. The second sheet has descriptions of each column. (XLSX 316 kb) [file 13293_2015_53_MOESM1_ESM.xlsx]

## Sheet: List
Gene Name	Balaton consensus calls		Carrel hybrids	Carrel SNPs	Cotton AI	Cotton DNAm		Transcript Start	Transcript Stop	Transcript Type	CTAG gene	Expression in GM12878	Expression in IMR90	Expressed in Either Tissue	Domain categories	Results from other literature	Lister mCH	Sex differences in expression	Y homology	alternate gene names	Related Diseases	Comments
PLCXD1	PAR		1		E			192990	220022	mRNA	No	2.02064	0.00952676	Lymphoblast only	PAR				PAR	FLJ11323
GTPBP6	PAR		1		E			221425	230887	mRNA	No	5.42321	0	Lymphoblast only	PAR				PAR	PGPL
PPP2R3B-AS1	PAR							281384	282054	ncRNA	No	1.571	0	Lymphoblast only	PAR				PAR
PPP2R3B	PAR		1	E	E			294667	347690	mRNA	No	0.48229	0	Lymphoblast only	PAR				PAR	PR48
SHOX	PAR		1					585078	620146	mRNA	No	0.00104398	0	Neither	PAR				PAR	None	LMD, LWD
DQ576039	PAR							800013	800044	piRNA	No	0	0	Neither	PAR				PAR
CRLF2	PAR							1314886	1656037	mRNA	No	4.51803	0.000301961	Lymphoblast only	PAR				PAR
CSF2RA	PAR							1387692	1428828	mRNA	No	0.0458341	0	Neither	PAR				PAR
MIR3690	PAR							1412810	1412885	miRNA	No	0	0	Neither	PAR				PAR
IL3RA	PAR				E			1455508	1501582	mRNA	No	1.14363	0	Lymphoblast only	PAR				PAR
SLC25A6	PAR		1					1505044	1511039	mRNA	No	152.856	0	Lymphoblast only	PAR				PAR	ANT3
ASMTL-AS1	PAR							1519423	1534314	ncRNA	No	4.93595	0.00691746	Lymphoblast only	PAR				PAR
ASMTL	PAR		1		E			1522031	1572655	mRNA	No	2.74648	0.00203486	Lymphoblast only	PAR			Male Bias	PAR	None
P2RY8	PAR				E			1581465	1656037	mRNA	No	4.13302	0	Lymphoblast only	PAR			Male Bias	PAR
AKAP17A	PAR		1					1710485	1721411	mRNA	No	17.5258	0	Lymphoblast only	PAR				PAR	DXYS155E, XE7
ASMT	PAR				E			1714276	1761974	mRNA	No	3.12219	0	Lymphoblast only	PAR			Female Bias	PAR
DHRSX	PAR		1		E			2137554	2419015	mRNA	No	0.573534	0.000548998	Lymphoblast only	PAR			Male Bias	PAR	CXORF11
ZBED1	PAR		1					2404454	2419015	mRNA	No	6.23261	0.0106113	Lymphoblast only	PAR			Male Bias	PAR	ALTE
CD99P1	PAR		1					2527305	2575270	ncRNA	No	0.422854	0	Lymphoblast only	PAR				PAR	FLJ43159
LINC00102	PAR							2531031	2533388	ncRNA	No	0.100922	0	Lymphoblast only	PAR				PAR
CD99	PAR		1		E			2609227	2659350	mRNA	No	0.917582	0.000513799	Lymphoblast only	PAR	VE		Male Bias	PAR	MIC2
XG	PAR		1		E			2670092	2734541	mRNA	No	0.00454445	0.00639347	Neither	PAR			Female Bias	PAR	None
GYG2	Mostly E		1	VE		all F E or E+U		2746862	2800861	mRNA	No	0.00169497	0.841287	Fibroblast Only	E	S	E	Female Bias	Y pseudogene	None
ARSD	Mostly E		1	E	VE	all F E or E+U		2822010	2847416	mRNA	No	0.182646	1.51337	Both	E	S	E	Female Bias	Y pseudogene	None
ARSE	Mostly VE		1	VE	VE			2852672	2886286	mRNA	No	0.00462882	0.39456	Fibroblast Only	E		E		Y pseudogene	CDPX	Chondrodysplasia punctata 1
ARSH	E				E			2924653	2951426	mRNA	No	0.00273484	0.00384757	Neither	E				Y pseudogene
ARSF	No call							2958274	3030770	mRNA	No	0.00101001	0.00390762	Neither	E				Y pseudogene
CXorf28	E		0.78					3189860	3202694	ncRNA	No	0.00142623	0.0862804	Neither	E					AA348446
MXRA5	Mostly E		0.78		VE	all F E or E+U		3226608	3264684	mRNA	No	0.00144226	0.658096	Fibroblast Only	E				Y pseudogene	DKFZP564I1922
PRKX	E		0.78		E	all F E or E+U		3522383	3631675	mRNA	No	0.553391	0.535372	Both	E				Y pseudogene	None
LOC389906	No call							3735575	3761935	ncRNA	No	1.13781	2.15322	Both	E
TRNA_Ile	No call							3756417	3756491	tRNA	No	0.122037	0.343382	Both	E
AK000470	No call							3771064	3781615	mRNA	No	0.103221	0.397825	Both	E
AK097803	No call							3782438	3799884	ncRNA	No	0.198301	0.301126	Both	E
TRNA_Ile	No call							3794841	3794915	tRNA	No	0.122037	0.343382	Both	E
AK000470	No call							3809488	3820041	mRNA	No	0.103221	0.397825	Both	E
TRNA_Ile	No call							3833270	3833344	tRNA	No	0.122037	0.343382	Both	E
NLGN4X	Mostly E		1		VE	all F E		5808082	6145888	mRNA	No	0.000785749	0.00243961	Neither	E		E		Y homolog	KIAA1260	AUTSX2, ASPGX2
MIR4770	No call							6301946	6302004	miRNA	No	0	0	Neither	E
VCX3A	No call							6451658	6453159	mRNA	No	0	0	Neither	E
VCX2	No call							6451688	6453159	mRNA	No	0	0	Neither	E
HDHD1	E		0.89		E	all F E or E+U		6966960	7066231	mRNA	No	0.935086	0.596679	Both	E		E	Female Bias		HDHD1A, GS1
STS	E		1	E	E	all F E or E+U		7065292	7272682	mRNA	No	0.582601	0.235941	Both	E	E	E		Y pseudogene	Hs.186498	XLI
MIR4767	No call							7065900	7065978	miRNA	No	3.12818	0.651992	Both	E
VCX	No call							7810302	7812184	mRNA	No	0.0145823	0	Neither	E
PNPLA4	E		1		E	all F E or E+U		7866803	7895780	mRNA	No	0.410294	0.833631	Both	E		E		Y pseudogene	GS2, DXS1283E
MIR651	No call							8095005	8095102	miRNA	No	0	0	Neither	E
VCX2	No call							8137984	8139308	mRNA	No	0	0	Neither	E
VCX3B	No call							8432870	8434551	mRNA	No	0.0108832	0.0306227	Neither	E
VCX3A	No call							8433345	8434346	mRNA	No	0	0	Neither	E
VCX-8r	No call							8434331	8434546	mRNA	No	0	0	Neither	E
KAL1	Mostly E		1		VE	all F E or E+U		8496914	8700227	mRNA	No	0.00207083	0.00924687	Neither	E		E		Y pseudogene	ADMLX	Kallmann syndrome 1
FAM9A	No call							8758836	8769424	mRNA	No	0.00086437	0.00486423	Neither	Boundary
FAM9B	No call							8993036	9001351	mRNA	No	0.00110063	0	Neither	Boundary
DQ595787	No call							9373384	9382288	piRNA	No	0.00102783	0.0404887	Neither	Boundary							There are 10 copies of DQ595787 in this region. Each is about 60 bp.
DQ597811	No call							9374425	9382251	piRNA	No	0.00116939	0.0329036	Neither	Boundary							There are 3 copis of DQ597811 in this region. Each is about 40 bp.
DQ580770	No call							9375782	9380608	piRNA	No	0	0.0480181	Neither	Boundary							There are 5 copies of DQ580770 is this region. Each is about 50 bp
TBL1X	Discordant		0.78	S	S	all F E		9431334	9687780	mRNA	No	0.267681	0.547316	Both	Boundary				Y homolog	None
GPR143	Mostly S		0.78	S	S			9693452	9734005	mRNA	No	0.0155729	0.0190514	Neither	S				Y pseudogene	OA1	XLOA, NYS6
SHROOM2	Mostly VE				VE	E or E+U and VE and U		9754495	9917481	mRNA	No	0.0384112	0.475928	Fibroblast Only	S				Y pseudogene
LOC100288814	No call							9935397	9936042	mRNA	No	0	0.318931	Fibroblast Only	S
WWC3	Mostly S		0.111111		S	S or S+U and VE and U		9983794	10112518	mRNA	No	0.364406	1.24102	Both	S	S			Y pseudogene	KIAA1280
CLCN4	Mostly S		0.56	S	S	too much U		10124984	10205699	mRNA	No	0.00544297	0.296093	Fibroblast Only	S					23809
MID1	Mostly S		0.11		VE	too much U		10413349	10588674	mRNA	No	0.00569029	0.913511	Fibroblast Only	S	S			Y pseudogene	FXY, Hs.122516	XLOS, Tracheoesophageal fistula
U6	No call							10550856	10550959	snRNA	No	0	0.247632	Fibroblast Only	S
Mir_652	No call							10939960	10940057	miRNA	No	0	0	Neither	S
AY660577	No call							10981490	11125110	mRNA	No	0.0312909	0.0199042	Neither	S
AY660578	S					all F S or S+U		10988010	11129258	mRNA	No	0.0326588	0.0213324	Neither	S
HCCS	S		0			all F S		11129405	11141204	mRNA	No	1.38611	4.09876	Both	S		S				MCOPS7
ARHGAP6	Mostly S		0.11	E	S	S or S+U and VE and U		11155662	11683821	mRNA	No	0.0477258	0.0287691	Neither	S				Y pseudogene
AMELX	No call							11311532	11318881	mRNA	No	0.0124528	0.00700781	Neither	S	S			Y homolog		AI1E
Mir_584	No call							11615063	11615191	miRNA	No	0.212856	0	Lymphoblast only	S
MSL3	Discordant		0.33	S	E	all F S or S+U		11776277	11793872	mRNA	No	5.14234	4.51816	Both	S	VE				MSL3L1
Y_RNA	No call							12072942	12073045	ncRNA	No	0	0	Neither	S
FRMPD4	Discordant		0.22		VE	too much U		12156584	12742642	mRNA	No	0.00146805	0.0308486	Neither	S				Y pseudogene	PDZK10, M62076
Mir_1302	No call							12251432	12251484	miRNA	No	0	0	Neither	S
Mir_548	No call							12633886	12633970	miRNA	No	0	0	Neither	S
PRPS2	S		0	S	S	all F S or S+U		12809473	12842346	mRNA	No	1.93141	1.70077	Both	S		S			None
TLR7	S				S			12885201	12908480	mRNA	No	5.59509	0	Lymphoblast only	S	S			Y pseudogene
TLR8-AS1	No call							12920935	12961419	ncRNA	No	0.00768669	0.00127226	Neither	Boundary
TLR8	No call							12924738	12941288	mRNA	No	0.00774209	0.00311204	Neither	Boundary				Y pseudogene
TMSB4X	No call					too much U		12993225	12995346	mRNA	No	458.9	24.9284	Both	Boundary				Y homolog
FAM9C	E		0.78					13053735	13062917	mRNA	No	0.020931	0.00560899	Neither	E					None
ATXN3L	No call							13336767	13338518	mRNA	No	0.125381	0	Lymphoblast only	Boundary
LOC100133123	No call							13353359	13359944	ncRNA	No	0.0250153	0	Neither	Boundary
EGFL6	S				S			13587693	13651694	mRNA	No	0.00286016	0.00241433	Neither	S				Y pseudogene
7SK	No call							13614354	13614667	snRNA	No	0	0	Neither	Boundary
TCEANC	Mostly E		1		VE	E or E+U and VE		13671224	13700083	mRNA	No	0.203924	0.207921	Both	E					MGC17403
RAB9A	Mostly E		1		VE	all F E or E+U		13707239	13727944	mRNA	No	2.31848	1.49502	Both	E				Y pseudogene	None
TRAPPC2	Mostly E		1	E	VE	all F E or E+U		13730360	13752754	mRNA	No	1.02992	1.91011	Both	E	E	E	Female Bias		SEDL	SEDT
OFD1	Mostly E		1		VE	all F E or E+U		13752831	13787480	mRNA	No	2.06037	1.93914	Both	E		E	Female Bias	Y pseudogene	CXORF5	OFD1, JBTS10, SGBS2, RP23
GPM6B	Mostly E		0.89		VE	all F E or E+U		13789061	13956831	mRNA	No	0.0819422	0.180675	Fibroblast Only	E	VE	E		Y pseudogene	None
GEMIN8	Mostly E		1		VE	all F E or E+U		14024844	14048035	mRNA	No	1.5427	2.45633	Both	E		E	Female Bias		FAM51A1, XE59, FLJ20514
GLRA2	Mostly S		0.11		S	E or E+U and VE		14547419	14749933	mRNA	No	0.0189822	0.042093	Neither	S				Y pseudogene	None
FANCB	S		0		S	all F S or S+U		14861528	14891184	mRNA	No	0.285476	0.697313	Both	S		S		Y pseudogene	FLJ34064	FANCB, Tracheoesophageal Fistula, VACTERLX
MOSPD2	S		0		S	all F S or S+U		14891526	14939459	mRNA	No	0.234291	1.77569	Both	S		S			None
ASB9	S				S			15262108	15288589	mRNA	No	0.00552998	0.0223675	Neither	S
ASB11	VE		0.33		VE			15299830	15333746	mRNA	No	0.00377803	0	Neither	S				Y pseudogene	None
PIGA	S		0	S	S	all F S or S+U		15337572	15353676	mRNA	No	1.25087	1.52715	Both	S		S			EUROIMAGE 35971	PNH, MCAHS2
FIGF	S				S			15363712	15402535	mRNA	No	0.0132021	0.0371473	Neither	S
PIR-FIGF	No call							15363712	15509432	ncRNA	No	0.0373723	0.203419	Fibroblast Only	Boundary
PIR	Discordant		1	VE	S	E or E+U and VE and U		15402923	15511711	mRNA	No	0.0473672	0.265848	Fibroblast Only	Boundary	S				None
Mir_544	No call							15470854	15470959	miRNA	No	0	0	Neither	Boundary
BMX	No call							15482368	15574652	mRNA	No	0.19231	0.0912549	Lymphoblast only	Boundary
ACE2	E				E			15579155	15620192	mRNA	No	0.000669098	0	Neither	E				Y pseudogene
TMEM27	Discordant		1		VE			15645440	15683154	mRNA	No	0.00703782	0.0368739	Neither	E		E		Y pseudogene	NX17
CA5BP1	E				E	all F E		15693038	15721474	ncRNA	No	1.03221	2.44432	Both	E		E			CA5BP
BC021816	No call							15719056	15721483	mRNA	No	2.89135	11.8374	Both	E
CA5B	Mostly E		1	E	E	E or E+U and VE and U		15756411	15805748	mRNA	No	0.263057	0.517287	Both	E	E		Female Bias		INE2
INE2	No call							15803838	15805712	ncRNA	No	0.673647	2.71959	Both	E
ZRSR2	E				E	all F E		15808573	15841382	mRNA	No	1.15742	1.58086	Both	E		E	Female Bias	Y pseudogene
AP1S2	Mostly E		1		VE	all F E		15843928	15873100	mRNA	No	2.00576	3.00855	Both	E		E			SIGMA1B, Hs.121592, Hs.431654	MRXS5
GRPR	Mostly VE		0.66	S	VE			16141423	16171641	mRNA	No	0.0318027	1.02439	Fibroblast Only	E					None
CTPS2	Mostly E		1		S	all F E or E+U		16606121	16731059	mRNA	No	0.274792	0.609733	Both	E		E			Hs.431102
S100G	E		1					16668280	16672791	mRNA	No	0.0365139	0.0399547	Neither	E		E			CALB3
SYAP1	E		1		E	all F E		16737706	16780807	ncRNA	No	0.908019	2.33684	Both	E		E	Female Bias	Y pseudogene	None
TXLNG	E		1		E	all F E		16804554	16862642	mRNA	No	0.85164	1.32428	Both	E	S	E	Female Bias	Y homolog	CXORF15, ELRG, FIAT, LSR5
AX746622	No call							16853680	16855808	ncRNA	No	0.769541	1.08869	Both	E
RBBP7	Mostly E		1		S	E or E+U and VE		16862774	16888534	mRNA	No	4.07952	3.8689	Both	E		E		Y pseudogene	RbAp46
U4	No call							16893268	16893390	snrna	No	0	0	Neither	Boundary
REPS2	Discordant		0.22		VE			16964813	17171403	mRNA	No	0.0125823	0.00747962	Neither	Boundary				Y pseudogene	POB1
NHS	Mostly VE		0.33		VE	all F S		17393542	17754113	mRNA	No	0.00129459	0.0360694	Neither	Boundary					None	NHS, CTRCT40
MIR4768	No call							17444003	17444077	miRNA	No	0	0	Neither	Boundary
SCML1	S		0		S	all F S or S+U		17755591	17773105	mRNA	No	0.123849	3.84798	Both	S		S			None
RAI2	S		0			all F S		17818168	17879457	mRNA	No	0.00119469	0.00798369	Neither	S				Y pseudogene	None
BEND2	VE				VE			18181050	18239024	mRNA	No	0.00284175	0.000888441	Neither	S				Y pseudogene
SCML2	Mostly S		0		VE	all F S or S+U		18257432	18372844	mRNA	No	0.0179229	0.145936	Fibroblast Only	S		S		Y pseudogene	Hs.220888
CDKL5	Mostly S		0.22		VE	S or S+U and VE and U		18443724	18671749	mRNA	No	0.0770675	0.34707	Fibroblast Only	S				Y pseudogene	STK9, Hs.435570, Hs.446513	AS, EIEE2, Angelman syndrome-like
IRES_Cx43	No call							18552981	18553187	ncRNA	No	0	0	Neither	S
RS1	Discordant		0.22		VE			18657807	18690223	mRNA	No	0.00875273	0.0079445	Neither	S					None	RS1
TRNA_Val	Mostly S					S or S+U and VE		18693028	18693101	tRNA	No	0.123687	0	Lymphoblast only	S
PPEF1	VE				VE			18709044	18846034	mRNA	No	0.00641407	0.00375991	Neither	S
LOC100132163	No call							18908413	18913093	ncRNA	No	2.89777	4.90756	Both	S
PHKA2	Mostly S		0.22		S	S or S+U and VE and U		18910415	19002480	mRNA	No	0.572138	1.63503	Both	S					None	GSD9A1
GPR64	Mostly S		0		VE	too much U		19007424	19140755	mRNA	No	0.0195643	0.102565	Fibroblast Only	S					Hs.149297, DKFZp686C0388, FLJ13808
PDHA1	S		0	S	S	too much U		19362010	19379825	mRNA	No	3.69483	5.55809	Both	S	S	S			None	PDHAD, X-linked Leigh syndrome
MAP3K15	Mostly S				VE	all F S		19378175	19533379	mRNA	No	0.0441114	0.172903	Fibroblast Only	S				Y pseudogene
SH3KBP1	Mostly S		0.44		S	all F S or S+U		19552082	19905744	mRNA	No	0.915558	0.288949	Both	S					CIN85, N53651
CXorf23	S		0.11		S			19930979	19988382	mRNA	No	0.390482	0.547789	Both	S					None
BC046187	No call							19931205	19934282	mRNA	No	1.17755	2.2842	Both	Boundary
LOC729609	No call							20004934	20007897	ncRNA	No	0.0802878	0.0695106	Neither	Boundary
MAP7D2	Discordant		0		VE	too much U		20024830	20134756	mRNA	No	0.0208157	0.0203824	Neither	Boundary		S	Female Bias		FLJ14503
MIR23C	No call							20035205	20035305	miRNA	No	0	0	Neither	Boundary
EIF1AX	E		1			all F E or E+U		20142635	20159966	mRNA	No	2.07327	3.90198	Both	E		E	Female Bias	Y homolog	EIF4C
SCARNA9L	No call							20154183	20154531	ncRNA	No	2.5439	2.21378	Both	Boundary
RPS6KA3	S		0		S	all F S or S+U		20168028	20285523	mRNA	No	0.698909	1.39732	Both	S		S		Y pseudogene	None	CLS, MRX19
7SK	No call							20470225	20470549	snRNA	No	0	0	Neither	S
Mir_544	No call							21273651	21273755	miRNA	No	0	0	Neither	S
CNKSR2	Mostly S				VE	all F S or S+U		21392535	21672813	mRNA	No	0.0091437	0.0105669	Neither	S				Y pseudogene
JA611288	No call							21671685	21671755	ncRNA	No	0.128913	1.08818	Both	S
KLHL34	No call							21673608	21676448	mRNA	No	0.00644337	0.01813	Neither	S
SMPX	S				S			21724089	21776278	ncRNA	No	0.00175375	0.00296076	Neither	S				Y pseudogene		Hereditary hearing loss and deafness
MBTPS2	S				S	all F S or S+U		21857655	21903541	mRNA	No	0.462358	2.11139	Both	S	S	S				IFAP syndrome with or without BRESHECK syndrome. KFSDX. OLMSTED SYNDROME, X-LINKED
YY2	S		0					21874104	21876845	mRNA	No	0.550771	5.92654	Both	S					MBTPS2
SMS	S		0		S	all F S or S+U		21958714	22012955	mRNA	No	0.574898	1.52408	Both	S		S			SpS	MRXSSR
PHEX	VE		0.33		VE			22050920	22266478	mRNA	No	0.00641158	0.00860213	Neither	S		S		Y pseudogene	PEX, FLJ37866	XLHR
Mir_548	No call							22191615	22191699	miRNA	No	0	0	Neither	S
ZNF645	No call							22291029	22292576	mRNA	yes	0.00591267	0	Neither	S
DDX53	No call							23018077	23020206	mRNA	yes	0	0	Neither	S				Y pseudogene
PTCHD1	Discordant		0.22		E			23352984	23399551	mRNA	No	0.0172962	0.0033182	Neither	S				Y pseudogene	Hs.444490	AUTS1
PRDX4	S		0		S	all F S or S+U		23685644	23704514	mRNA	No	1.65489	2.38554	Both	S		S			None
ACOT9	S		0.22	S	S	all F S or S+U		23721776	23761407	mRNA	No	0.310159	2.29322	Both	S	S				ACATE2, MT-ACT48
Y_RNA	No call							23800326	23800427	ncRNA	No	0	0	Neither	S
SAT1	S		0.11			too much U		23801274	23804327	mRNA	No	19.4685	22.077	Both	S		E			SAT	KFSDX
AK310094	S					all F S or S+U		23801293	23801569	ncRNA	No	36.3469	23.0575	Both	S
APOO	S		0.11		S	all F S or S+U		23851464	23926057	mRNA	No	0.110309	0.318322	Both	S				Y pseudogene	AA601738, MGC4825
RPL9	No call							23854760	23855459	mRNA	No	1.41215	0.809402	Both	S
CXorf58	S				S	all F S or S+U		23926122	23957624	mRNA	No	0.0185944	0.0057225	Neither	S
KLHL15	S		0		S			24001832	24045303	mRNA	No	0.470147	0.739933	Both	S	S	S		Y pseudogene	None
EIF2S3	E		1		E	all F E or E+U		24073064	24096927	mRNA	No	11.1215	5.5427	Both	E	VE	E	Female Bias	Y pseudogene	None
ZFX	E		1	E	E	all F E		24167761	24234372	mRNA	No	1.06489	1.54842	Both	E	E	E	Female Bias	Y homolog	None
FAM48B2	No call							24328978	24331432	mRNA	No	0	0	Neither	Boundary
FAM48B1	No call							24380877	24383541	mRNA	No	0	0	Neither	Boundary
PDK3	S		0		S	all F S		24483343	24568583	mRNA	No	1.25168	0.266477	Both	S		S		Y pseudogene	Hs.403937
PCYT1B	S		0		S	all F S or S+U		24576203	24690979	mRNA	No	0.00311003	0.00785331	Neither	S		S			Hs.403937
POLA1	S		0		S	all F S or S+U		24712057	25015102	mRNA	No	0.465907	0.229878	Both	S		S		Y pseudogene	POLA, Z39260	NSX
SCARNA23	No call							24762557	24762687	ncRNA	No	0	0	Neither	Boundary
ARX	No call					too much U		25021812	25034065	mRNA	yes	0.00224077	0.00420331	Neither	Boundary						EIEE1, LISX2, MRXARX, PRTS, Proud Levine Carpenter syndrome
MAGEB18	No call							26156459	26158853	mRNA	yes	0	0	Neither	Boundary
MAGEB6	No call							26210556	26213763	mRNA	yes	0.00570624	0	Neither	Boundary				Y pseudogene
VENTXP1	E				E			26576453	26579169	ncRNA	yes	0	0	Neither	E
BC024027	No call							27193032	27417114	ncRNA	No	0.00110283	0.00137915	Neither	Boundary
SMEK3P	No call							27478327	27481458	ncRNA	No	0.00584471	0	Neither	Boundary
AK057304	No call							27608529	27651912	mRNA	No	0.00105486	0.00474897	Neither	Boundary
DCAF8L2	No call							27764925	27766938	mRNA	No	0.331755	0.0255747	Lymphoblast only	Boundary
MAGEB10	No call							27826106	27841131	mRNA	yes	0.000609132	0	Neither	Boundary				Y pseudogene
DCAF8L1	No call							27996109	27999566	mRNA	No	0.0688181	0	Neither	Boundary
IL1RAPL1	Discordant				VE	S or S+U and VE and U		28605680	29974017	mRNA	No	0.016582	0.0186518	Neither	Boundary						mrx21
U2	No call							29769566	29769659	snRNA	No	0	0	Neither	Boundary
MAGEB2	No call							30233674	30238206	mRNA	yes	0	0.0170441	Neither	Boundary
MAGEB3	No call							30248552	30255610	mRNA	yes	0.00259323	0	Neither	Boundary
MAGEB4	No call							30260056	30262308	mRNA	yes	0.0121875	0.0228617	Neither	Boundary
MAGEB1	No call							30261847	30270155	mRNA	yes	0.00881243	0.00619899	Neither	Boundary
NR0B1	S					all F S or S+U		30322538	30327495	mRNA	No	0.00184607	0.0259719	Neither	S				Y pseudogene		AHC, SRXY2
CXorf21	VE				VE			30577566	30596033	mRNA	No	1.20134	0	Lymphoblast only	S			Female Bias
GK	S		0		S	too much U		30671475	30749577	mRNA	No	0.123634	0.379861	Both	S		S			None	GKD
TAB3	S		0.22		S	S or S+U and VE and U		30845558	30993201	mRNA	No	0.357138	0.440787	Both	S				Y pseudogene	NAP1,MAP3K7IP3
Mir_548	No call							31039384	31039467	miRNA	No	0	0	Neither	S
FTHL17	No call							31089357	31090170	mRNA	yes	0	0	Neither	S
DMD	S		0.11		S	all F S or S+U		31137344	33357726	mRNA	No	0.0134754	0.0406188	Neither	S				Y pseudogene	Hs.177986, AA461044	DMD, BMD, CMD3B
Mir_584	No call							31356817	31356938	miRNA	No	0.212856	0	Lymphoblast only	S
U6	No call							31366308	31366414	snrna	No	0	0.247632	Fibroblast Only	S
JA202363	No call							31697634	31697665	ncRNA	No	0	0	Neither	S
JA202352	No call							31792219	31792244	ncRNA	No	0	4.95263	Fibroblast Only	S
JA202350	No call							31950207	31950238	ncRNA	No	0	0.804803	Fibroblast Only	S
JA202335	No call							32583973	32584010	ncRNA	No	0	5.42183	Fibroblast Only	S
FAM47A	No call							34147868	34150447	mRNA	No	0	0	Neither	S
TMEM47	S		0			too much U		34645180	34675405	mRNA	No	0.000302813	3.5564	Fibroblast Only	S		S			TM4SF10
FAM47B	No call							34960912	34963034	mRNA	No	0	0.0242616	Neither	S
MAGEB16	No call							35816458	35821852	mRNA	yes	0	0	Neither	S				Y pseudogene
CXorf22	No call					too much U		35937850	36008269	mRNA	No	0.00142972	0.00292572	Neither	S
CXorf59	No call							36065052	36163187	mRNA	No	0.000652866	0.000524857	Neither	S				Y pseudogene
CXorf30	No call							36254050	36403434	mRNA	No	0.0115187	0.00206878	Neither	S
FAM47C	No call							37026431	37029739	mRNA	No	0	0	Neither	S
PRRG1	Mostly S		0	S		S or S+U and VE and U		37208527	37316548	mRNA	No	0.0011015	0.422942	Fibroblast Only	S		S			None
LANCL3	Mostly S		0.11		E	all F S or S+U		37430821	37536750	mRNA	No	0.00103685	0.00048624	Neither	S				Y pseudogene	FLJ42925
BC132858	No call							37478968	37480588	ncRNA	No	0	0	Neither	S
XK	S					all F S		37545132	37591383	mRNA	No	0.00830779	0.008909	Neither	S				Y pseudogene		MCLDS
CYBB	S				S			37639269	37672714	mRNA	No	7.38005	0	Lymphoblast only	S				Y pseudogene		CGD, IMD34
DYNLT3	S		0	S	S	all F S or S+U		37698088	37706889	mRNA	No	0.765334	4.24839	Both	S		S			TCTE1L
CXorf27	No call							37850069	37850570	mRNA	No	0	0	Neither	S
SYTL5	S		0					37865834	37988073	mRNA	No	0.000673882	0.0309702	Neither	S		S		Y pseudogene	None
SRPX	S		0	S		all F S or S+U		38008587	38080177	mRNA	No	0.00242912	1.01661	Fibroblast Only	S		S			ETX1
RPGR	S		0		S	S or S+U and VE and U		38128422	38186788	mRNA	No	0.255608	0.341517	Both	S		S			RP3	RP3, CORDX1. Retinitis pigmentosa, X-linked, and sinorespiratory infections, with or without deafness. Macular degeneration, X-linked atrophic.
OTC	S		0					38211735	38280703	mRNA	No	0.00132709	0.000746819	Neither	S		S			None	OTCD
TSPAN7	Mostly S		0.11	S	VE	all F S or S+U		38420730	38548172	mRNA	No	0.00143638	0.00262704	Neither	S	S				TM4SF2	MRX58
MID1IP1	S		0			all F S or S+U		38660684	38665783	mRNA	No	8.56236	12.9475	Both	S		S			MIG12
LOC286442	No call							39164209	39186616	ncRNA	No	0.00449308	0.00229862	Neither	S
AK123758	No call							39868528	39871435	ncRNA	No	0	0	Neither	S
BCOR	Mostly S		0.22		S	E or E+U and VE		39910498	40036582	mRNA	No	0.626182	0.574369	Both	S				Y pseudogene	FLJ43479	MCOPS2, MCOPS1
DQ596633	No call							40217979	40218014	piRNA	No	0	0	Neither	S
DQ594696	No call							40218597	40218633	piRNA	No	0	0	Neither	S
DQ574810	No call							40219039	40219066	piRNA	No	0	0	Neither	S
DQ579129	No call							40219847	40219877	piRNA	No	0	0	Neither	S
ATP6AP2	Mostly S		0.11		S	S or S+U and VE and U		40440215	40465888	mRNA	No	2.0292	3.15877	Both	S				Y pseudogene	M8-9	MRXSH, XPDS
LOC347411	E		1					40482817	40483388	mRNA	No	0.0160014	0.0450239	Neither	E					Hs.128084
CXorf38	E		0.89		E	all F E or E+U		40486172	40506819	mRNA	No	2.08297	2.5619	Both	E		E			MGC39350
MED14	VE				VE			40508794	40595136	mRNA	No	1.0998	2.17619	Both	E		E		Y pseudogene
BC039399	No call							40594651	40597946	mRNA	No	0.438757	0.828244	Both	E
AK056524	No call							40671202	40704710	ncRNA	No	0.0879526	0.0637905	Neither	E
LOC100132831	No call							40690469	40692449	ncRNA	No	1.26596	0	Lymphoblast only	E
Mir_584	No call							40715000	40715119	miRNA	No	0.212856	0	Lymphoblast only	E
USP9X	Mostly E		1		VE	all F E or E+U		40944887	41095832	mRNA	No	1.6852	1.74164	Both	E	E	E		Y homolog	DFFRX, Hs.282780, Hs.86849, Hs.229338	MRX99
5S_rRNA	No call							41152050	41152169	rRNA	No	0	0.214614	Fibroblast Only	E
DDX3X	E		1		E	all F E or E+U		41192650	41223725	mRNA	No	11.3786	5.6735	Both	E		E		Y homolog	DBX
NYX	S				S			41306712	41334905	mRNA	No	0.0103884	0.00548067	Neither	S				Y pseudogene		CSNB1A
CASK	S		0		S	all F S or S+U		41374188	41782287	mRNA	No	0.0654894	0.236396	Fibroblast Only	S		S		Y pseudogene		FGS4, MICPCH
GPR34	S		0	S				41548225	41556530	mRNA	No	0.308546	0.0372073	Lymphoblast only	S		S		Y pseudogene	None
GPR82	No call							41583407	41589388	mRNA	No	0.290711	0.0387468	Lymphoblast only	S
U6	No call							41778506	41778602	snRNA	No	0	0.247632	Fibroblast Only	S
PPP1R2P9	No call							42636616	42637486	ncRNA	No	0	0.029568	Neither	S
DD413549	No call							42729652	42729672	ncRNA	No	0	0	Neither	S
AK056105	No call							43036242	43085847	ncRNA	No	0.045205	0.00415332	Neither	S
DQ570500	No call							43137548	43137585	piRNA	No	0.240863	0	Lymphoblast only	S
MAOA	Mostly S		1	S		all F S or S+U		43515408	43606068	mRNA	No	0.0016153	0.0176121	Neither	S	S	E			None	Monoamine oxidase A deficiency
MAOB	S				S	too much U		43625856	43741721	mRNA	No	0.00110593	0.036897	Neither	S				Y pseudogene
NDP	No call							43808023	43832921	mRNA	No	0	0.0486133	Neither	Boundary						ND, EVR2
EFHC2	Discordant				VE	all F E or E+U		44007127	44202923	mRNA	No	0.0469334	0.0240705	Neither	Boundary		E
Y_RNA	No call							44260848	44260950	ncRNA	No	0	0	Neither	Boundary
FUNDC1	E		0.89		E	all F E or E+U		44382884	44402221	mRNA	No	0.380539	1.136	Both	E				Y pseudogene	None
DUSP21	No call							44703248	44704134	mRNA	No	0	0	Neither	E
KDM6A	Mostly E		1	E	VE	all F E		44732422	44971845	mRNA	No	0.430873	0.451021	Both	E	E	E	Female Bias	Y homolog	UTX	KABUK1, KABUK2
CXorf36	S				S			45007617	45060146	mRNA	No	0.0017424	0.00245133	Neither	S	E
AK127697	No call							45364632	45386484	ncRNA	No	0.00125651	0.131992	Fibroblast Only	S
MIR221	No call							45605584	45605694	miRNA	No	1.07195	48.7232	Both	S
MIR222	No call							45606420	45606530	miRNA	No	0	5.10433	Fibroblast Only	S
AK098783	Mostly S					S or S+U and VE and U		45707326	45710447	ncRNA	No	0.00586343	0.494946	Fibroblast Only	S
BC015977	No call							46185713	46187080	mRNA	No	0.0267626	0	Neither	S
ZNF673	S		0		S	all F S or S+U		46306623	46334074	mRNA	No	0.775848	1.99072	Both	S		S		Y pseudogene	FLJ20344
AX747333	No call							46319732	46321944	mRNA	No	0.173709	0.325849	Both	S
ZNF674	S				S	all F S or S+U		46357159	46404892	mRNA	No	0.223576	0.37443	Both	S						MRX92
LOC401588	S					all F S		46404927	46407670	ncRNA	No	1.61108	6.41026	Both	S
CHST7	S		0	S	S	all F S or S+U		46433191	46457838	mRNA	No	0.796526	0.914252	Both	S		S		Y pseudogene	None
SLC9A7	S		0.11		S	all F S or S+U		46466372	46618472	mRNA	No	0.825794	0.497122	Both	S					NHE7, FLJ39602, ZC35F11
Mir_548	No call							46565633	46565717	miRNA	No	0	0	Neither	S
RP2	S		0			all F S or S+U		46696346	46741791	mRNA	No	0.293037	1.01097	Both	S		S			None	RP2
PHF16	Mostly S		0	S	VE	all F S or S+U		46771735	46920641	mRNA	No	0.0914009	0.176756	Fibroblast Only	S		S			None
RGN	S		0.11					46937774	46952712	mRNA	No	0.00551411	0.172392	Fibroblast Only	S				Y pseudogene	None
NDUFB11	S		0			all F S or S+U		47001614	47004609	mRNA	No	17.0072	7.29802	Both	S		S			P17.3
RBM10	S		0		S	all F S or S+U		47004616	47046214	mRNA	No	2.14238	3.35858	Both	S	S	S			DXS8237E	TARPS
UBA1	E		1	E	E	all F E		47050198	47074527	mRNA	No	18.5024	10.0305	Both	E	E	E	Female Bias		UBE1, A1S9, A1ST, GXP1, UBE1, A1S9T, AMCX1, POC20, SMAX2, UBA1A, UBE1X	SMAX2
INE1	E		1					47064246	47065254	ncRNA	No	6.14118	6.04918	Both	E	E		Female Bias		None
CDK16	Mostly E		1		VE	E or E+U and VE and U		47077527	47089394	mRNA	No	5.30212	10.6396	Both	E	E	E		Y pseudogene	PCTK1
USP11	Discordant		0.44		S	too much U		47092313	47107727	mRNA	No	4.75127	7.40617	Both	Boundary	E	E		Y pseudogene	UHX
ZNF157	Discordant		0		E			47229998	47273098	mRNA	No	0.0110426	0.00179256	Neither	Boundary	S	S			None
SNORA11C	No call							47248048	47248175	snoRNA	No	0	0	Neither	Boundary
ZNF41	S		0	S	S	all F S or S+U		47305560	47342610	mRNA	No	0.678599	0.809082	Both	S		S		Y pseudogene	None
ARAF	S		0		S	all F S or S+U		47420515	47431320	mRNA	No	6.90061	8.91345	Both	S	S	S			ARAF1, PKS2, A-RAF, RAFA1
SYN1	Mostly S		0		VE	all F S		47431299	47479256	mRNA	No	1.17583	1.48106	Both	S		S		Y pseudogene	None	Epilepsy, X-linked, with variable learning disabilities and behavior disorders
TIMP1	VE		0.33			too much U		47441689	47446190	mRNA	No	11.9564	14.5987	Both	S	S				None
MIR4769	No call							47446827	47446904	miRNA	No	0	0	Neither	S
CFP	S		0		S			47483611	47489704	mRNA	No	1.87292	0.23666	Both	S		S			PFC	CFPD
ELK1	S		0		S	all F S		47494919	47510003	mRNA	No	4.25392	4.33297	Both	S	S	S			None
UXT	S		0		S	all F S		47511190	47518579	mRNA	No	6.84913	5.95227	Both	S		S			None
LOC100133957	No call					too much U		47518231	47519776	ncRNA	No	5.67166	3.56487	Both	S
CXXC1P1	No call							47566589	47596027	ncRNA	No	0.00124363	0	Neither	S
LOC441493	Mostly S					S or S+U and VE		47693820	47696192	mRNA	No	0.0925695	0.0217056	Neither	S
ZNF81	Mostly S		0		S	S or S+U and VE and U		47696300	47781655	mRNA	No	0.239876	0.263101	Both	S		S		Y pseudogene	None	MRX45
ZNF182	S				S	all F S or S+U		47834249	47863394	mRNA	No	0.877409	0.679496	Both	S		S
ZNF630	Mostly S				S	S or S+U and VE		47842684	47931001	mRNA	No	0.210897	0.106435	Both	S				Y pseudogene
SPACA5	Mostly S					S or S+U and VE		47863733	47869128	mRNA	No	0.0254433	0	Neither	S		E
LOC100509575	No call							47967366	47980068	mRNA	No	0.00288209	0.00810948	Neither	S
SPACA5	No call							47986602	47991997	mRNA	No	0.0254433	0	Neither	S
SSX5	No call							48045655	48056199	mRNA	yes	0.00260393	0	Neither	S
SSX1	No call							48114796	48126879	mRNA	yes	0.000757432	0	Neither	S						Synovial Sarcoma
SSX9	No call							48159066	48164284	mRNA	yes	0	0.0049346	Neither	S
SSX3	No call							48205862	48216142	mRNA	yes	0.00267079	0	Neither	S
SSX4	No call							48242967	48252785	mRNA	yes	0	0	Neither	S
SSX4B	No call							48261523	48271344	mRNA	yes	0	0	Neither	S
SLC38A5	S		0.11		S			48316926	48328644	mRNA	No	5.7538	4.50508	Both	S					None
FTSJ1	S		0		S	all F S or S+U		48334548	48344752	mRNA	No	4.82798	8.26995	Both	S		S		Y pseudogene	JM23	MRX9
PORCN	Mostly S		0		VE	all F S or S+U		48367370	48379202	mRNA	No	1.21903	3.23853	Both	S		S			None	FDH
EBP	Mostly S		0	S		S or S+U and VE and U		48380163	48387104	mRNA	No	6.34975	4.44438	Both	S	S	S			None	CDPX2
TBC1D25	S		0	S	S	all F S		48398074	48420997	mRNA	No	1.99314	2.60076	Both	S		S		Y pseudogene	OATL1
RBM3	S		0	S		all F S or S+U		48432740	48439553	mRNA	No	35.7193	19.8463	Both	S		S			RNPL, Hs.432724, IS4
WDR13	S		0	S	S	all F S or S+U		48455879	48463582	mRNA	No	5.36765	9.95849	Both	S		S			None
WAS	VE		0.44					48542185	48549817	mRNA	No	11.2932	0.111342	Both	S				Y pseudogene	None	WAS, SCNX, THC1
SUV39H1	S		0	S		all F S or S+U		48553944	48567406	mRNA	No	1.92125	2.93442	Both	S		S			None
GLOD5	No call							48620153	48632064	mRNA	No	0.00614695	0	Neither	S
GATA1	S		0.11					48644981	48652717	mRNA	No	0.131312	0.0166432	Lymphoblast only	S				Y pseudogene	None	Cancer in Downs syndrome patients
HDAC6	Mostly S		0		S	S or S+U and VE and U		48660286	48683380	mRNA	No	2.69175	4.59875	Both	S		S			JM21	Chondrodysplasia with platyspondyly, distinctive brachydactyly, hydrocephaly, and microphthalmia
ERAS	No call							48687282	48688548	mRNA	No	0.043344	0	Neither	S
PCSK1N	S		0			all F S		48689505	48693960	mRNA	No	0.00616213	0.0924728	Neither	S		S			None
TIMM17B	Mostly S		0	S		S or S+U and VE and U		48750729	48755426	mRNA	No	4.4147	8.49685	Both	S		S			JM3
PQBP1	Mostly S		0		VE	all F S		48755774	48760422	mRNA	No	6.91235	8.47562	Both	S		S		Y pseudogene	JM26	RENS1
SLC35A2	S		0			all F S or S+U		48760889	48769235	mRNA	No	2.78521	7.88624	Both	S		S		Y pseudogene	UGT2	CDG2M
PIM2	S		0		S	all F S or S+U		48770458	48776413	mRNA	No	65.2929	4.98124	Both	S		S			None
OTUD5	S		0		S	all F S or S+U		48779302	48815648	mRNA	No	3.38669	2.83845	Both	S		S			DKFZp761A052, Hs.443531
U6	No call							48816439	48816543	snRNA	No	0	0.247632	Fibroblast Only	S
KCND1	Mostly S		0.11			S or S+U and VE		48818638	48828251	mRNA	No	0.535993	1.7787	Both	S				Y pseudogene	None
GRIPAP1	S		0.11		S	all F S or S+U		48830133	48858675	mRNA	No	3.54947	3.96009	Both	S		E		Y pseudogene	None
TFE3	Mostly S		0			S or S+U and VE		48886241	48900990	mRNA	No	1.84859	7.60563	Both	S					None	RCCX1
CCDC120	S		0			too much U		48911100	48927510	mRNA	No	0.689905	1.35273	Both	S		S		Y pseudogene	JM11
PRAF2	S		0			all F S		48928817	48937564	mRNA	No	4.37343	12.4941	Both	S		S			JM4
WDR45	S		0			all F S or S+U		48932091	48958059	mRNA	No	1.32945	2.88786	Both	S		S			WDRX1	BPAN, NBIA5
GPKOW	Mostly S		0		S	S or S+U and VE and U		48969021	48980079	mRNA	No	1.46988	4.58299	Both	S		S			T54
MAGIX	Mostly S		0.11		S	S or S+U and VE		49019180	49023836	mRNA	No	0.245673	0.52536	Both	S					FLJ21687
PLP2	S		0		S	all F S		49028183	49031468	mRNA	No	17.1441	12.6417	Both	S		S			None
PRICKLE3	S		0		S			49031905	49042776	mRNA	No	1.90263	2.2859	Both	S		S			LMO6
SYP	S		0.22		S	all F S		49044264	49056661	mRNA	No	0.234763	0.0519311	Lymphoblast only	S		E			None	MRX96
CACNA1F	S		0		S			49061522	49089833	mRNA	No	0.0607774	0.0118253	Neither	S		S		Y pseudogene	None	CSNB2A, AIED, CORDX3
CCDC22	S		0		S	all F S or S+U		49091926	49106987	mRNA	No	1.91296	3.41285	Both	S		S		Y pseudogene	JM1
FOXP3	S		0		S			49106896	49121288	mRNA	No	0.295703	0.103781	Both	S		S		Y pseudogene	JM2	IDDM1, IPEX
PPP1R3F	S		0		S	all F S or S+U		49126305	49144555	mRNA	No	1.04412	1.08089	Both	S		S		Y pseudogene	None
GAGE10	No call							49160124	49176311	mRNA	yes	0.0147006	0.0206819	Neither	S
GAGE4	No call							49178515	49223953	mRNA	yes	0	0	Neither	S							There is multiple copies of GAGE4 in this region. Each is about 7 kb.
GAGE12J	No call							49178515	49294598	mRNA	yes	7.88464e-05	0.000887416	Neither	S
GAGE13	No call							49188093	49323262	mRNA	yes	6.77133e-05	0.000762112	Neither	S
GAGE2E	No call							49188093	49204923	mRNA	yes	0	0	Neither	S							There is 2 copies of GAGE2E in this region. Each is around 7 kb.
GAGE8	No call							49188093	49373139	mRNA	yes	4.94613e-05	0.000695869	Neither	S
GAGE2C	No call							49197562	49233491	mRNA	yes	0	0.0028671	Neither	S
GAGE2D	No call							49197562	49223953	mRNA	yes	0	0	Neither	S
GAGE2A	No call							49197562	49361430	mRNA	yes	5.58544e-05	0.000785801	Neither	S							There are multiple copies of GAGE2A in this region. Each is around 16 kb.
GAGE7	No call							49216633	49223953	mRNA	yes	0	0	Neither	S
GAGE12I	No call							49216633	49342370	mRNA	yes	7.27927e-05	0.000819281	Neither	S							There are multiple copies of GAGE12I across this region. Each is around 10 kb.
GAGE2B	No call							49216633	49304144	mRNA	yes	0.000104589	0.00117715	Neither	S
GAGE12F	No call							49217762	49233491	mRNA	yes	0	0.00654893	Neither	S
GAGE12B	No call							49296768	49323262	mRNA	yes	0	0	Neither	S							There are 3 copies of GAGE12B. Each is about 10 kb
GAGE12D	No call							49296768	49342370	mRNA	yes	0	0	Neither	S							There are 5 copies of GAGE12D across this region. Each is about 8 kb.
GAGE12E	No call							49344540	49351917	mRNA	yes	0	0	Neither	S
GAGE1	No call							49363615	49373139	mRNA	yes	0	0	Neither	S
PAGE1	No call							49452053	49460596	mRNA	yes	0.00220523	0	Neither	S
PAGE4	No call							49593905	49598570	mRNA	yes	0	0	Neither	S
LOC158572	S					all F S or S+U		49641326	49643959	ncRNA	No	0.13552	1.10485	Both	S
USP27X	No call					too much U		49644469	49647168	mRNA	No	0.694936	4.11105	Both	S
CLCN5	S		0		S	all F S		49687224	49863892	mRNA	No	0.0792139	0.195045	Fibroblast Only	S		S		Y pseudogene	None	NPHL2. Proteinuria, low molecular weight, with hypercalciuria and nephrocalcinosis. X-linked recessive hypophosphatemic rickets. XRN.
MIR532	No call							49767753	49767844	miRNA	No	0	0	Neither	S
MIR188	No call							49768108	49768194	miRNA	No	0	0	Neither	S
Mir_500	No call							49771257	49771345	miRNA	No	0	0	Neither	S
MIR500A	No call							49773038	49773122	miRNA	No	0	0	Neither	S
MIR362	No call							49773571	49773635	miRNA	No	0	0	Neither	S
MIR501	No call							49774329	49774413	miRNA	No	0	0.302985	Fibroblast Only	S
MIR500B	No call							49775279	49775358	miRNA	No	0	0	Neither	S
MIR660	No call							49777848	49777945	miRNA	No	0	0	Neither	S
MIR502	No call							49779205	49779291	miRNA	No	0	0	Neither	S
AKAP4	S				S			49955410	49965004	mRNA	yes	0	0	Neither	S				Y pseudogene
CCNB3	Mostly S		0.22		VE			49969415	50094911	mRNA	No	#N/A	0.00718247		S				Y pseudogene	None
DGKK	S				S	all F S or S+U		50111878	50213721	mRNA	No	0.000898709	0.00202299	Neither	S						HYSP1
AX748273	No call							50331931	50333932	ncRNA	No	0	0.411647	Fibroblast Only	S
SHROOM4	Mostly S		0		S	S or S+U and VE and U		50334642	50557044	mRNA	No	0.0019754	0.103523	Fibroblast Only	S		S		Y pseudogene	KIAA1202	SDSX
BMP15	No call							50653734	50659641	mRNA	No	0	0	Neither	S						ODG2
NUDT10	S		0		S			51075082	51080377	mRNA	No	0	0.607857	Fibroblast Only	S		S			DIPP3 beta
NUDT11	S		0					51232862	51239459	mRNA	No	0.00138721	5.05081	Fibroblast Only	S		S			DIPP3 alpha
TRNA_Pseudo	No call							51306111	51306183	tRNA	No	0	0	Neither	S
CENPVL1	No call							51424145	51425447	ncRNA	No	0	0	Neither	S
CENPVL1	No call							51453924	51455226	ncRNA	No	0	0	Neither	S
GSPT2	S		0					51486480	51489326	mRNA	No	6.53267	8.58456	Both	S		S		Y pseudogene	None
MAGED1	S				S	too much U		51546154	51645450	mRNA	yes	2.03949	1.57094	Both	S				Y pseudogene
BC137157	No call							51793955	51797392	mRNA	No	0	0	Neither	S
MAGED4B	No call							51804922	51812368	mRNA	yes	0	0.335452	Fibroblast Only	S
SNORA11E	No call							51806442	51806569	snoRNA	No	0	0	Neither	S
MAGED4	No call							51927918	51935364	mRNA	No	#N/A	-		S
MAGED4B	No call							51927918	51935364	mRNA	yes	0	0.335452	Fibroblast Only	S
SNORA11D	No call							51933717	51933844	snoRNA	No	0	0	Neither	S
AK096379	No call							51942921	51946358	mRNA	No	0	0	Neither	S
BC094793	No call							52108069	52111918	ncRNA	No	0	0	Neither	S
XAGE2	No call							52112077	52387096	mRNA	yes	0	0	Neither	S							There is 2 copies of XAGE2 here, on opposite strands. Each is around 7 kb.
XAGE1D	No call							52238809	52546197	mRNA	yes	2.9776e-05	0.000167564	Neither	S							There is multiple copies of XAGE1D on both strands here. Each is around 5 kb.
BC094793	No call							52387255	52391104	ncRNA	No	0	0	Neither	S
XAGE1C	No call							52541053	52545988	ncRNA	yes	0	0	Neither	S
SSX8	No call							52651984	52662998	ncRNA	yes	0.00166188	0.00467611	Neither	S
SSX7	No call							52673110	52683950	mRNA	yes	0.000844277	0.00475116	Neither	S
SSX2	No call							52725945	52790617	mRNA	yes	0.000141524	0	Neither	S						Synovial Sarcoma	There are 2 copies of SSX2 here, on opposite strands. Each is around 10 kb long
SPANXN5	No call							52825185	52826388	mRNA	yes	0	0.0427802	Neither	S
XAGE5	No call							52841227	52847322	mRNA	yes	0	0	Neither	S
XAGE3	No call							52891557	52897119	mRNA	yes	0	0	Neither	S
FAM156A	S		0					52926321	52937585	mRNA	No	0.101562	0.507529	Both	S					TMEM29~, PRO0659, DXS6672E
FAM156B	No call							52926425	52937585	mRNA	No	0.102509	0.509951	Both	S
FAM156B	No call							52976463	52985953	mRNA	No	0.102509	0.509951	Both	S
FAM156A	S		0			all F S or S+U		52976463	53024651	mRNA	No	0.101562	0.507529	Both	S					TMEM29~, PRO0659, DXS6672E
GPR173	Mostly S		0		VE			53078505	53109796	mRNA	No	0.0178423	2.30032	Fibroblast Only	S		S		Y pseudogene	SREB3
TSPYL2	S		0		S	all F S		53111541	53117728	mRNA	yes	12.4424	14.4958	Both	S	S	S		Y homolog	SE20-4 , TSPX
DQ590295	No call							53172141	53172180	piRNA	No	0.686461	3.21921	Both	Boundary
KDM5C	Mostly E		1		VE	all F E		53220502	53254604	mRNA	No	6.90346	6.52772	Both	E	E	E	Female Bias	Y homolog	JARID1C, A009X24, SMCX	MRXSCJ
AY927613	No call							53221897	53223882	mRNA	No	26.4215	22.2784	Both	E
IQSEC2	Mostly E		1		VE	all F E or E+U		53262057	53350522	mRNA	No	0.0104496	0.626768	Fibroblast Only	E		E		Y pseudogene	KIAA0522, AF069137	MRX1
SMC1A	Mostly E		0.78	E	VE	E or E+U and VE		53401069	53449618	mRNA	No	5.61951	3.91636	Both	E	E	E	Female Bias	Y pseudogene	SMC1L1	CDLS2
RIBC1	Discordant		0.78	VE	VE	all F E or E+U		53449838	53458057	mRNA	No	0.165909	0.209914	Both	Boundary					FLJ32783
HSD17B10	Mostly S		0.11			S or S+U and VE and U		53458205	53461323	mRNA	No	14.1386	12.7323	Both	S	S				HADH2, SCHAD	2-methyl-3-hydroxybutyric aciduria, MRXS10
svRNAa	No call							53489158	53489180	ncRNA	No	0	0	Neither	S
HUWE1	Mostly S		0.11		S	S or S+U and VE and U		53559062	53713673	mRNA	No	4.70031	2.93196	Both	S				Y pseudogene		MRXST
MIR98	No call							53583183	53583302	miRNA	No	0.533914	0.643842	Both	S
MIRLET7F2	No call							53584152	53584235	miRNA	No	0.326886	0	Lymphoblast only	S
DM119504	No call							53584206	53584228	miRNA	No	0.397948	0	Lymphoblast only	S
PHF8	S		0		S	all F S or S+U		53963112	54071569	mRNA	No	0.605079	0.866704	Both	S		S			Hs.347445	MRXSSD
FAM120C	S				S	all F S		54094756	54209714	mRNA	No	0.280176	0.534524	Both	S
WNK3	S		0			all F S or S+U		54219255	54384438	mRNA	No	0.00703704	0.0363268	Neither	S		S			FLJ42662, PRKWNK3
TSR2	S		0.11		S	all F S or S+U		54466852	54471731	mRNA	No	6.24567	7.79999	Both	S		E			DT1P1A10, SP096
FGD1	Mostly S		0.11		S	S or S+U and VE		54471886	54522599	mRNA	No	0.171996	2.11508	Both	S		E			None	AAS
GNL3L	Mostly S		0		S	S or S+U and VE		54556643	54593720	mRNA	No	3.14737	3.27981	Both	S	S	S		Y pseudogene	FLJ10613
ITIH6	No call							54775331	54824673	mRNA	No	0.00148395	0.00313159	Neither	S				Y pseudogene	ITIH5L
MAGED2	Mostly S		0		S	S or S+U and VE and U		54834170	54842445	mRNA	yes	3.38198	14.0718	Both	S	S	S			JCL-1
SNORA11	No call							54840802	54840933	snoRNA	No	0.416037	4.87759	Both	S
TRO	Mostly S		0		S	S or S+U and VE and U		54947248	54950201	mRNA	No	0.0340829	12.1009	Fibroblast Only	S		S		Y pseudogene	None
SNORA11	No call							54953737	54953866	snoRNA	No	0.416037	4.87759	Both	S
PFKFB1	Discordant		0		VE			54959589	55024967	mRNA	No	0.0845577	0.0397853	Neither	S		S			Hs.13041
APEX2	S		0			all F S or S+U		55026779	55034212	mRNA	No	5.90734	8.00602	Both	S		S		Y pseudogene	XTH2
ALAS2	S		0		S			55035487	55057497	mRNA	No	0.158431	0.00585019	Lymphoblast only	S	S			Y pseudogene	None	XLSA, XLEPP
PAGE2B	No call							55101503	55119260	mRNA	yes	0.0144317	0	Neither	S
PAGE2	No call							55115496	55119260	mRNA	yes	0.0121551	0	Neither	S
FAM104B	S		0.11		S	all F S or S+U		55169534	55187628	mRNA	No	0.285788	0.651848	Both	S					LOC90736
TRNA_Pseudo	No call							55206665	55206737	tRNA	No	0	0	Neither	S
MTRNR2L10	No call							55207823	55208944	mRNA	No	29.0328	0	Lymphoblast only	S
PAGE5	No call							55246790	55250541	mRNA	yes	0	0.027456	Neither	S
PAGE3	No call							55284848	55291165	ncRNA	yes	0	0	Neither	S
MIR4536-1	No call					too much U		55477892	55477953	miRNA	No	0	0	Neither	S
MAGEH1	S		0.11			all F S		55478537	55479999	mRNA	yes	8.10177	18.061	Both	S					APR-1
USP51	S		0			all F S or S+U		55511048	55515631	mRNA	No	0.575046	0.539344	Both	S					Hs.40061
FOXR2	No call							55649832	55652621	mRNA	No	0.00656115	0	Neither	S
RRAGB	Mostly S		0		S	S or S+U and VE and U		55744109	55785207	mRNA	No	0.761639	1.23508	Both	S		S			None
KLF8	S		0		S	all F S or S+U		56258821	56314322	mRNA	No	0.103068	0.00603218	Lymphoblast only	S		S			None
UBQLN2	S		0.22			all F S or S+U		56590025	56593443	mRNA	No	12.7668	19.8934	Both	S				Y pseudogene	None	ALS15
LOC550643	S		0.11		S	too much U		56755717	56844004	ncRNA	No	0.564172	0.309786	Both	S	S				DKFZp686L07201, LOC389861, Hs.404298, G06389		Has female specific CTCF binding sites
UQCRBP1	No call							56763220	56764017	ncRNA	No	23.1458	0.290455	Both	S
SPIN3	Mostly S		0		S	S or S+U and VE		57002802	57021958	ncRNA	No	1.27854	1.68716	Both	S					LOC169981
SPIN2B	Mostly S					S or S+U and VE and U		57146114	57163033	mRNA	No	0.243426	0.633188	Both	S
SPIN2A	S		0					57162082	57164058	mRNA	No	0.115741	0.429879	Both	S					Y09858
FAAH2	S		0.22		S			57313109	57515629	mRNA	No	0.153796	0.0227626	Lymphoblast only	S	S				FLJ31204
ZXDB	S		0			all F S		57618268	57623910	mRNA	No	1.7858	4.4543	Both	S	S				None
ZXDA	S		0	S				57931863	57937067	mRNA	No	0.926711	1.65259	Both	S	S			Y pseudogene	None
Centromere														Centromere	Centromere
SPIN4	Mostly S					S or S+U and VE and U		62567106	62571218	mRNA	No	2.6526	4.79633	Both	S				Y pseudogene
AK130294	No call							62646437	62651523	ncRNA	No	4.22285	4.75383	Both	S
LOC92249	Mostly S		0.11		VE	too much U		62646438	62780873	ncRNA	No	0.236112	0.293483	Both	S					None
ARHGEF9	S					all F S or S+U		62854847	63005426	mRNA	No	0.560973	0.432364	Both	S		E				EIEE8
MIR1468	No call							63005881	63005967	miRNA	No	0	0	Neither	S
AMER1	S					all F S or S+U		63404996	63425624	mRNA	No	0.93751	1.17227	Both	S				Y pseudogene	FAM123B	OSCS
ASB12	S		0					63444071	63450511	mRNA	No	0.0227364	0.0159936	Neither	S				Y pseudogene	None
MTMR8	S		0		S	all F S or S+U		63444071	63615333	mRNA	No	0.0607113	0.00345863	Neither	S		S			None
ZC4H2	S		0.11		S	all F S or S+U		64135681	64254624	mRNA	No	0.136818	0.329543	Both	S				Y pseudogene	HCA127
ZC3H12B	Discordant		0.11		VE			64708614	64727767	mRNA	No	0.15817	0.228575	Both	S					FLJ34366
LAS1L	S		0.11		S	all F S or S+U		64732461	64754686	mRNA	No	2.96707	4.52248	Both	S		E		Y pseudogene	FLJ12525
FRMD8P1	No call							64770501	64772301	ncRNA	No	2.32759	1.25837	Both	S
BC067907	No call							64808260	64845760	ncRNA	No	0.00292882	0.0315903	Neither	S
MSN	S		0.11		S	all F S or S+U		64887510	64961793	mRNA	No	8.62164	2.75066	Both	S					Hs.87752
JA611242	No call							64905377	64905400	ncRNA	No	0.762734	1.07307	Both	S
mir-223	No call							65235302	65240264	miRNA	No	1.21902	0	Lymphoblast only	S
MIR223	No call							65238711	65238821	miRNA	No	1.48424	0	Lymphoblast only	S
VSIG4	No call							65241579	65259967	mRNA	No	0.0189139	0.00560198	Neither	S
HEPH	S				S			65382432	65487230	mRNA	No	0.0167687	1.21397	Fibroblast Only	S
EDA2R	Discordant		0.44		S			65815481	65859140	mRNA	No	0.672939	2.17662	Both	S	S				XEDAR
U6	No call							65896099	65896206	snrna	No	0	0.247632	Fibroblast Only	S
AR	Mostly S		0		S	S or S+U and VE and U		66763873	66950461	mRNA	No	0.000981067	0.148099	Fibroblast Only	S		S		Y pseudogene	None	Prostate cancer, AIS, SMAX1, PAIS, HYSP1
OPHN1	S		0	S	S	all F S or S+U		67262185	67653299	mRNA	No	0.13318	0.155135	Both	S		S		Y pseudogene	YB62F01, WI-12732	MRX60
YIPF6	S		0		S	all F S or S+U		67718623	67757127	mRNA	No	0.759703	2.14163	Both	S		S			MGC21416
STARD8	S		0.11		S	all F S or S+U		67867510	67945684	mRNA	No	0.0286849	0.409819	Fibroblast Only	S				Y pseudogene	KIAA0189
EFNB1	Mostly S		0.11		VE	all F S		68048839	68066029	mRNA	No	0.11234	4.49427	Both	S					EPLG2	CFNS
PJA1	S		0.11		S	all F S or S+U		68380580	68385365	mRNA	No	2.92599	7.9209	Both	S		E		Y pseudogene	None
NCRNA00269	No call							68399399	68429767	mRNA	No	0.00210971	0.0033921	Neither	S
FAM155B	S					all F S		68725077	68752351	mRNA	No	0.00167788	0	Neither	S
EDA	Mostly S		0		VE	all F S		68835910	69259321	mRNA	No	0.0140725	0.00973187	Neither	S		S		Y pseudogene	ED1	XHED, STHAGX1
MIR676	No call							69242706	69242773	miRNA	No	0	0	Neither	S
AWAT2	No call							69260391	69269788	mRNA	No	0.00097391	0.0191824	Neither	S
OTUD6A	No call							69282340	69284029	mRNA	No	0	0.0152389	Neither	S				Y pseudogene
IGBP1	Mostly S		0		S	S or S+U and VE and U		69353298	69386173	mRNA	No	3.15432	1.68422	Both	S		S			alpha4, Hs.442732	MRXS28
DGAT2L6	VE				VE			69397335	69425553	mRNA	No	0.0175149	0.010039	Neither	S
Metazoa_SRP	No call							69441854	69442167	ncRNA	No	0.0874472	0	Neither	S
AWAT1	S				S			69454504	69460511	mRNA	No	0.0472266	0.00857313	Neither	S
5S_rRNA	No call							69472891	69473012	rRNA	No	0	0.214614	Fibroblast Only	S
P2RY4	S				S			69478015	69479654	mRNA	No	0.145106	0.188442	Both	S				Y pseudogene
ARR3	S		0		S			69488184	69501690	mRNA	No	0.191771	0.234523	Both	S					None
RAB41	S				S			69502021	69504852	mRNA	No	0.106654	0.582004	Both	S
PDZD11	Mostly S		0.22			S or S+U and VE		69506210	69509798	mRNA	No	3.89422	9.78052	Both	S					LOC51248
KIF4A	S		0.11		S	all F S or S+U		69509878	69640774	mRNA	No	0.209282	0.623494	Both	S		S		Y pseudogene	None	MRX100
GDPD2	No call							69642880	69653241	mRNA	No	0.00971636	0.164036	Fibroblast Only	S
DLG3	S		0	S	S	all F S or S+U		69664704	69725339	mRNA	No	0.115625	1.12935	Both	S	S	S			None	MRX90
U4	No call							69670728	69670872	snRNA	No	0	0	Neither	S
TEX11	No call							69748789	70128567	mRNA	No	0.00286794	0.00183093	Neither	S				Y pseudogene
SLC7A3	Mostly S					S or S+U and VE and U		70145429	70150975	mRNA	No	0.00495014	0.00928563	Neither	S
SNX12	S		0			all F S or S+U		70209363	70288231	mRNA	No	0.705589	1.05961	Both	S		S		Y pseudogene	None
BC080535	No call							70279096	70280672	unknown	No	16.7502	23.7613	Both	S	S
FOXO4	VE		0.33			too much U		70315998	70323384	mRNA	No	1.99114	1.84428	Both	S					MLLT7, AFX 1
CXorf65	VE				VE			70323738	70326638	mRNA	No	1.44817	0.017755	Lymphoblast only	S
IL2RG	No call							70327253	70331481	mRNA	No	59.2195	0	Lymphoblast only	S						SCIDX1, CIDX
MED12	S		0		S	all F S or S+U		70338405	70362304	mRNA	No	4.10383	6.8619	Both	S	S	S		Y pseudogene	TNRC11	OKS, X-linked mental retardation with marfanoid habitus syndrome, OHDOX.
NLGN3	S		0		S			70364680	70391051	mRNA	No	0.795821	0.180663	Both	S		S			None	AUTSX1, ASPGX1
BCYRN1	No call							70430034	70948962	ncRNA	No	2.83645	1.39213	Both	S
GJB1	No call							70435061	70445065	mRNA	No	0.00914824	0.00514816	Neither	S						CMTX1
ZMYM3	S		0	S	S	all F S or S+U		70459473	70474038	mRNA	No	5.36752	10.6314	Both	S	S	S		Y pseudogene	ZNF261, DXS6673E
NONO	Mostly S		0			S or S+U and VE and U		70503041	70521018	mRNA	No	15.5345	7.23418	Both	S		S		Y pseudogene	p54nrb
ITGB1BP2	No call							70521627	70525204	mRNA	No	0.409293	3.10225	Both	S		S
TAF1	S		0		S	all F S or S+U		70586113	70752224	mRNA	No	0.696302	0.744183	Both	S		S			CCG1	DYT3
INGX	No call							70711376	70712604	ncRNA	No	0.0372368	0.04191	Neither	S
OGT	Mostly S		0		S	S or S+U and VE		70752911	70795747	mRNA	No	21.5307	6.6505	Both	S		S			GlcNAc
ACRC	S		0.11					70797873	70833433	mRNA	No	0.223666	0.296202	Both	S				Y pseudogene	NAAR1
CXCR3	S		0					70835765	70838367	mRNA	No	20.1517	0.0395754	Lymphoblast only	S		S		Y pseudogene	GPR9
LOC100132741	No call							70917045	70923256	ncRNA	No	0	0	Neither	S
CXorf49	No call							70934223	70987051	mRNA	No	0	0	Neither	S							There is 2 copies of CXorf49 here on opposite strands. Each is about 4 kb.
NHSL2	Discordant				VE	all F S		71130937	71363424	mRNA	No	0.0119682	0.125618	Fibroblast Only	S				Y pseudogene
RPS26P11	No call							71264258	71264811	ncRNA	No	0.660853	0.418381	Both	S
RGAG4	S		0			all F S		71346960	71351751	mRNA	No	0.259763	4.25108	Both	S					KIAA2001
FLJ44635	VE				VE			71364033	71381600	mRNA	No	8.39633	0.492557	Both	S
PIN4	Discordant		0.33		S	too much U		71401525	71483814	mRNA	No	0.358371	0.454422	Both	S				Y pseudogene	None
ERCC6L	S		0.22			all F S or S+U		71424506	71458858	mRNA	No	0.531536	0.631978	Both	S			Female Bias	Y pseudogene	FLJ20105
RPS4X	Mostly E		1		E	E or E+U and VE		71492452	71497141	mRNA	No	270.523	15.0019	Both	E	E	E	Female Bias	Y homolog	None
CITED1	Discordant		0.11			all F E or E+U		71521487	71527037	mRNA	No	0.0181374	0.157742	Fibroblast Only	Boundary					None
HDAC8	S		0.22		S	all F S or S+U		71549365	71792953	mRNA	No	0.343659	0.292544	Both	S					Hs.37464	CDLS
PHKA1	Mostly S		0		VE	all F S or S+U		71798663	71934029	mRNA	No	0.0102098	0.320192	Fibroblast Only	S		S		Y pseudogene	None	GSD9D
LOC100129407	No call							72001688	72002484	ncRNA	No	0	0	Neither	S
DMRTC1B	No call							72062799	72097698	mRNA	No	0	0	Neither	S							There are 2 copies of DMRTC1B in this region, they are on opposite strands. Each is about6 kb.
DMRTC1	No call							72064875	72095622	mRNA	No	0	0	Neither	S				Y pseudogene			There are 2 copies of DMRTC1 in this region, they are on opposite strands. Each is about 4 kb.
LOC100129407	No call							72158002	72158798	ncRNA	No	0	0	Neither	S
LINC00246B	No call							72161567	72163589	ncRNA	No	0.00452438	0	Neither	S
PABPC1L2B	No call							72223351	72225551	mRNA	No	0	0	Neither	S
PABPC1L2A	No call							72297176	72299351	mRNA	No	0	0	Neither	S
NAP1L6	No call							72345875	72347919	ncRNA	No	0.0134271	0	Neither	S
NAP1L2	S		0			all F S		72432136	72434710	mRNA	No	2.36729	0.120017	Both	S				Y pseudogene	None
CDX4	No call							72667089	72674421	mRNA	No	0	0	Neither	S
LOC139201	S				S	all F S or S+U		72744110	72782921	ncRNA	No	0.0754638	0.0504298	Neither	S
CHIC1	S		0		S	too much U		72782983	72906937	mRNA	No	0.130106	0.338452	Both	S		S			None
TSIX	VE				VE			73012039	73049066	ncRNA	No	19.4365	6.36678	Both	S	S
XIST	Mostly S		1	S	S			73040494	73072588	lncRNA	No	55.297	17.7568	Both	S	S		Female Bias		None	SXI1
JPX	E		1			all F E		73164158	73290217	ncRNA	No	0.479495	0.578774	Both	E			Female Bias		FLJ31610, Hs.258828, T54860, BC014382
FTX	S		0			too much U		73247970	73513409	ncRNA	No	0.697185	0.637439	Both	S	S				FLJ44396, DKFZp686K1098, FLJ26979, Hs.118526, DKFZp586J1922, Hs.374460, FLJ46440
AK125301	No call							73421436	73461983	ncRNA	No	2.15593	1.74854	Both	S	S
MIR421	No call							73438211	73438296	miRNA	No	5.42783	4.49192	Both	S
MIR374B	No call							73438381	73438453	miRNA	No	3.25991	4.93906	Both	S
MIR374C	No call							73438383	73438453	miRNA	No	3.35173	5.07819	Both	S
MIR545	No call							73506938	73507044	miRNA	No	0.0855403	0	Neither	S
MIR374A	No call							73507120	73507192	miRNA	No	0.125381	0.35279	Both	S
ZCCHC13	No call							73524024	73524869	mRNA	No	0	0	Neither	S
SLC16A2	Mostly S		0		VE	S or S+U and VE and U		73641084	73753752	mRNA	No	0.0101545	0.838425	Fibroblast Only	S		S			XPCT	AHDS
RLIM	S				S	all F S or S+U		73802810	73834461	mRNA	No	2.58605	3.52962	Both	S		S		Y pseudogene
KIAA2022	S		0		S	all F S or S+U		73952690	74145287	mRNA	No	0.248735	0.00120346	Lymphoblast only	S		S		Y pseudogene	None	XLID, MRX98
ABCB7	Mostly S		0.22		S	S or S+U and VE and U		74273104	74376132	mRNA	No	0.434858	0.442439	Both	S					Hs.182171	ASAT
UPRT	Mostly S				S	S or S+U and VE		74493893	74524732	mRNA	No	0.431524	0.814197	Both	S
AX748371	No call							74544123	74546232	ncRNA	No	0.221229	0.146466	Both	S
ZDHHC15	S				S	all F S or S+U		74588261	74743337	mRNA	No	0.00879414	0.00431783	Neither	S				Y pseudogene		MRX91
TTC3P1	No call							74960372	74962914	ncRNA	No	8.09104	5.55988	Both	S
MAGEE2	No call							75002822	75005079	mRNA	yes	0.00810701	0	Neither	S				Y pseudogene
PBDC1	S		0		S	all F S or S+U		75392770	75398033	mRNA	No	3.43687	6.03724	Both	S		S			CXorf26
MAGEE1	Discordant		0.44			S or S+U and VE and U		75648045	75651746	mRNA	yes	0.714523	3.72183	Both	S					MAGEC2
AK311342	No call							75878197	76234957	ncRNA	No	0.00159069	0.00310406	Neither	S
MIR384	No call							76139697	76139785	miRNA	No	0	0	Neither	S
5S_rRNA	No call							76287129	76287248	rRNA	No	0	0.214614	Fibroblast Only	S
FGF16	No call							76709646	76712013	mRNA	No	0.00773041	0	Neither	S
ATRX	S		0	S		all F S or S+U		76760355	77041719	mRNA	No	0.50864	0.652892	Both	S		S		Y pseudogene	XH2	ATRX, MRXHF1, ATMDS
MAGT1	S		0			all F S or S+U		77081861	77151065	mRNA	No	1.64461	1.34937	Both	S		S			DKFZp564K142	Carbohydrate-deficient glycoprotein syndrome, XMEN
COX7B	VE		0.33					77154960	77160881	mRNA	No	10.907	4.81849	Both	S					None	APLCC
ATP7A	Mostly S		0.44	S		all F S or S+U		77166193	77305892	mRNA	No	0.402409	0.581624	Both	S	S				None	MK, OHS, SMAX3
PGAM4	No call							77223457	77225135	mRNA	No	0.806799	0.536855	Both	S
PGK1	S		0		S	all F S or S+U		77359665	77382324	mRNA	No	36.2146	5.9929	Both	S		S			None	Phosphoglycerate kinase 1 deficiency
TAF9B	S		0			all F S or S+U		77385244	77395179	mRNA	No	1.87644	6.36066	Both	S		S			TAF9L
CYSLTR1	S				S			77528129	77583087	mRNA	No	0.318089	0.00421738	Lymphoblast only	S				Y pseudogene
ZCCHC5	No call							77911565	77914825	mRNA	No	0.0168405	1.84011	Fibroblast Only	S				Y pseudogene
LPAR4	No call							78003205	78012578	mRNA	No	0.00781123	0.00549471	Neither	S				Y pseudogene
MIR4328	No call							78156690	78156746	miRNA	No	0	0	Neither	S
P2RY10	VE				VE			78200828	78217438	mRNA	No	6.24459	0.0015504	Lymphoblast only	S
GPR174	VE				VE			78426468	78427726	mRNA	No	4.57277	0	Lymphoblast only	S	S
ITM2A	Discordant		0.56		S	too much U		78615880	78623049	mRNA	No	3.95728	0.0143675	Lymphoblast only	S	VE				None
TBX22	S					all F S or S+U		79270254	79287268	mRNA	No	0.000537926	0.00302717	Neither	S				Y pseudogene		CPX, ABERS
CR627394	No call							79483989	79565732	mRNA	No	0.00156757	0.00315053	Neither	S
FAM46D	No call							79591002	79700810	mRNA	yes	0.000916873	0.00211078	Neither	S
BRWD3	S				S	all F S		79924986	80065233	mRNA	No	0.785554	0.519855	Both	S				Y pseudogene		MRX93
HMGN5	Discordant				VE	E or E+U and VE and U		80369199	80457441	mRNA	No	0.0997813	0.0700439	Neither	S				Y pseudogene	NSBP1
SH3BGRL	Mostly S		0.89	S	S			80457302	80554046	mRNA	No	1.10965	0.649	Both	S					None
7SK	No call							81850262	81850481	snRNA	No	0	0	Neither	S
POU3F4	S					all F S or S+U		82763268	82764775	mRNA	No	0	0	Neither	S						Hereditary hearing loss and deafness, DFNX2
CYLC1	No call							83116169	83141626	mRNA	No	0.000719052	0.00101161	Neither	S				Y pseudogene
RPS6KA6	S		0		S	all F S or S+U		83313353	83442943	mRNA	No	0.0517	0.372222	Fibroblast Only	S		S		Y pseudogene	None
HDX	S				S	all F S or S+U		83572881	83757487	mRNA	No	0.0331194	0.0862144	Neither	S		S		Y pseudogene
UBE2DNL	No call							84189156	84189896	ncRNA	No	0	0	Neither	S
APOOL	Mostly S		0		S	S or S+U and VE		84258897	84348323	mRNA	No	0.290775	0.483816	Both	S		S			UNQ8193, FLJ39590
SATL1	S		0					84347291	84363974	mRNA	No	0.15251	0.396709	Both	S		S		Y pseudogene	None
Mir_548	No call							84396967	84397050	miRNA	No	0	0	Neither	Boundary
ZNF711	Discordant				VE	S or S+U and VE and U		84498996	84528368	mRNA	No	0.392312	0.939909	Both	Boundary	S			Y pseudogene		MRX97
POF1B	VE				VE			84532394	84634748	mRNA	No	0.029867	0.00377417	Neither	Boundary	S					POF2B
CHM	Discordant		0.78	VE	S	too much U		85116184	85302566	mRNA	No	0.166425	0.491354	Both	Boundary	VE				FLJ38564	CHM
Mir_361	No call							85158640	85158712	miRNA	No	0	0	Neither	Boundary
DACH2	Discordant				VE	all F S or S+U		85403454	86087605	mRNA	No	0.0069166	0.043892	Neither	Boundary				Y pseudogene
KLHL4	No call					too much U		86772714	86925050	mRNA	No	0.000841157	0.0365164	Neither	Boundary
CPXCR1	No call							88002225	88009785	mRNA	yes	0.00121053	0.00681224	Neither	Boundary				Y pseudogene
TGIF2LX	No call							89176939	89177882	mRNA	No	0	0.0545629	Neither	Boundary				Y homolog
PABPC5	Mostly VE					E or E+U and VE and U		90689596	90693583	mRNA	No	0	1.26573	Fibroblast Only	Boundary				Y pseudogene
PCDH11X	Discordant				VE	all F E or E+U		91034259	91878228	mRNA	No	0.112137	0.0233744	Lymphoblast only	Boundary				Y homolog
PCDHX	No call							91064464	91064633	ncRNA	No	0	0	Neither	Boundary
AK125288	No call							91354535	91360178	ncRNA	No	0	0	Neither	Boundary
DD413682	No call							91368316	91368338	ncRNA	No	0.795897	5.59863	Both	Boundary
CS706497	No call							91651900	91651987	ncRNA	No	0	0	Neither	Boundary
NAP1L3	Mostly E		0.78	S		all F E or E+U		92925924	92928682	mRNA	No	0.0232221	6.5341	Fibroblast Only	E				Y pseudogene	NPL
FAM133A	S				S			92929011	92967273	mRNA	yes	0.00239208	0.0141345	Neither	S
U6	No call							93258813	93258921	sRNA	No	0	0.247632	Fibroblast Only	S
Mir_548	No call							94318142	94318224	miRNA	No	0	0	Neither	S
DQ580189	No call							95306294	95306323	piRNA	No	0	0	Neither	S
LOC643486	No call							95592084	95592901	ncRNA	No	0	0	Neither	S
7SK	No call							95665430	95665781	snRNA	No	0	0	Neither	S
DIAPH2	Discordant		0.44		S	too much U		95939661	96855597	mRNA	No	0.0323268	0.0692811	Neither	S				Y pseudogene	HSU24186, HEIL2, Hs.157695, Hs.271686	POF2A
RPA4	No call							96138906	96140450	mRNA	No	0.106635	0.850122	Both	S
RBSG1	No call							96692825	96819534	mRNA	No	0.0422571	0.0272354	Neither	S
Mir_340	No call							97607750	97607847	miRNA	No	0	0	Neither	S
LOC442459	No call							98716599	99194841	ncRNA	No	0.0033875	0.00113086	Neither	S
PCDH19	S					all F S or S+U		99546641	99665271	mRNA	No	0.00169738	0.00151963	Neither	S				Y pseudogene		EIEE9
TNMD	No call							99839789	99854882	mRNA	No	0	0	Neither	S
TSPAN6	Mostly S		0.11			S or S+U and VE and U		99883794	99891794	mRNA	No	0.00571979	5.49772	Fibroblast Only	S					TM4SF6
SRPX2	VE		0.56		VE			99899162	99926296	mRNA	No	0.0053969	3.60371	Fibroblast Only	S					None	RESDX
SYTL4	Mostly S		0.78	S		all F S or S+U		99929488	99987135	mRNA	No	0.00619206	0.78805	Fibroblast Only	S					None
CSTF2	S		0		S	all F S or S+U		100075347	100095923	mRNA	No	1.02573	3.04509	Both	S		S			None
SNORA9	No call							100077608	100077741	snoRNA	No	0.0683046	0.192192	Fibroblast Only	S
NOX1	No call							100098312	100129334	mRNA	No	0.0566463	0.0273949	Neither	S
XKRX	S					all F S or S+U		100168430	100183898	mRNA	No	0.0538435	0.148172	Fibroblast Only	S				Y homolog
ARL13A	S				S			100224696	100245820	mRNA	No	0.108317	0.10972	Both	S
TRMT2B	S				S	all F S or S+U		100264333	100307105	mRNA	No	0.590173	1.30415	Both	S		S		Y pseudogene
TMEM35	S		0			too much U		100333835	100351355	mRNA	No	0.00940304	1.97698	Fibroblast Only	S					FLJ14084
CENPI	S		0	S	S	all F S or S+U		100353177	100417978	mRNA	No	0.304237	0.699461	Both	S		S		Y pseudogene	FSHPRH1
DRP2	S		0		S			100474932	100519485	mRNA	No	0.028555	2.72543	Fibroblast Only	S		S		Y pseudogene	None
TAF7L	E				E			100523240	100542793	mRNA	yes	0.0131062	0.122486	Fibroblast Only	E				Y pseudogene
TIMM8A	Mostly S		0.2			S or S+U and VE and U		100600643	100603957	mRNA	No	2.29441	4.57584	Both	S					DDP	MTS, Jensen Syndrome
BTK	S		0.22		S	all F S or S+U		100604434	100645770	mRNA	No	4.0243	0.00373811	Lymphoblast only	S				Y pseudogene	None	XLA, IGHD3
RPL36A	S		0.22			all F S or S+U		100645877	100651142	mRNA	No	2.82093	5.71706	Both	S					None
RPL36A-HNRNPH2	S					all F S		100645877	100669128	mRNA	No	4.51933	5.78716	Both	S
GLA	S		0.22		S	too much U		100652778	100663001	mRNA	No	1.43863	4.30991	Both	S					None	Fabry's disease
HNRNPH2	S		0		S	all F S or S+U		100663120	100669128	mRNA	No	12.5388	10.0075	Both	S		S		Y pseudogene	HNRPH2, FTP3, HNRPH', hnRNPH'
ARMCX4	Mostly S		0.33		S	all F S or S+U		100673265	100788446	ncRNA	No	0.0879665	0.472001	Fibroblast Only	S					None
ARMCX1	S		0.11			all F S or S+U		100805513	100809675	mRNA	No	0.0263833	8.97636	Fibroblast Only	S					ALEX1
ARMCX6	S		0			all F S or S+U		100870107	100872991	mRNA	No	4.4035	9.7748	Both	S		S		Y pseudogene	FLJ20811
ARMCX3	S		0	S		all F S or S+U		100878119	100882831	mRNA	No	18.0221	18.792	Both	S		S			ALEX3
ARMCX2	S		0.11			all F S or S+U		100910267	100914863	mRNA	No	5.05923	17.8377	Both	S				Y pseudogene	ALEX2, Hs.445729		One transcript had an escape methylation signature in the 450k study while the rest of the transcripts had subject levels of methylation
NXF5	E				E			101087084	101112549	mRNA	No	0.0111418	0	Neither	E
ZMAT1	Mostly S				VE	all F S or S+U		101137259	101145193	mRNA	No	2.79717	0.0227191	Lymphoblast only	S				Y pseudogene
TCEAL2	S		0					101380659	101382684	mRNA	No	0.0496944	0.0127116	Neither	S				Y pseudogene	my048
TCEAL6	No call							101394932	101397388	mRNA	No	0.0111756	0.0209635	Neither	S
BEX5	No call							101408678	101409237	mRNA	No	2.81122	0	Lymphoblast only	S
LL0XNC01-19D8.1	No call							101470279	101481785	mRNA	No	0	0	Neither	S
NXF2B	No call							101470279	101726732	mRNA	yes	#N/A	-		S							There are 2 of NXF2B across this region, one on each strand; each is about 110 kb
NXF2	No call							101470279	101726732	mRNA	yes	0.00010707	0.000502111	Neither	S				Y pseudogene			There are multiple copies of NXF2 across this region on both strands; each is about 10 kb
LL0XNC01-19D8.1	No call							101715239	101726732	mRNA	No	0	0	Neither	S
TMSB15A	S		0					101768609	101771699	mRNA	No	0.00592223	4.64916	Fibroblast Only	S		S			TMSNB, TMSL8
NXF4	No call							101804892	101826621	ncRNA	No	0.00505447	0.00474067	Neither	S
ARMCX5	S		0			all F S or S+U		101854095	101859085	mRNA	No	2.66277	8.11672	Both	S		S		Y pseudogene	FLJ12969
ARMCX5-GPRASP2	S					all F S or S+U		101854275	101972661	mRNA	No	0.186865	1.00176	Both	S
GPRASP1	S					all F S or S+U		101906293	101914010	mRNA	No	0.154168	2.6094	Both	S				Y pseudogene
GPRASP2	S		0			all F S or S+U		101967103	101972661	mRNA	No	0.176174	6.74998	Both	S		S		Y pseudogene	None
BHLHB9	S		0			all F S or S+U		101975641	102007369	mRNA	No	0.106445	0.681808	Both	S		S		Y pseudogene	KIAA1701, Hs.496518
LOC100287765	No call					too much U		102024094	102140338	ncRNA	No	0.0834615	0.130048	Fibroblast Only	S
RAB40AL	No call							102192199	102193228	mRNA	No	0.0710898	0.35005	Fibroblast Only	S
BEX1	S		0.22	S				102317580	102319168	mRNA	No	0	0.291735	Fibroblast Only	S					None
NXF3	VE		0.44					102330749	102348022	mRNA	No	0.0127167	0.0149089	Neither	S					None
BEX4	S		0			all F S		102470019	102472128	mRNA	No	4.86704	6.176	Both	S					BEXL1
TCEAL8	S		0			all F S or S+U		102507922	102510121	mRNA	No	10.4841	14.6445	Both	S					MGC45400
TCEAL5	No call							102528617	102531797	mRNA	No	0	0	Neither	S				Y pseudogene
BEX2	S		0					102564273	102565974	mRNA	No	1.17233	0.257234	Both	S					None
TCEAL7	S		0.11					102585113	102587251	mRNA	No	0	8.80128	Fibroblast Only	S					MGC23947
WBP5	VE		0.44			all 4 states		102611379	102613397	mRNA	No	1.06987	18.1896	Both	S					None
NGFRAP1	S		0					102631267	102633001	mRNA	No	1.27137	21.4936	Both	S			Male Bias		pHGR74
RAB40A	Discordant		0.33		S			102754680	102774417	mRNA	No	0.141897	0.624988	Both	S					None
TCEAL4	S		0.22	S	S			102840418	102842655	mRNA	No	8.65386	12.4281	Both	S				Y pseudogene	FLJ21174
TCEAL3	No call					too much U		102862833	102864855	mRNA	No	5.4202	11.1901	Both	S
TCEAL1	S		0			all F S or S+U		102883647	102885876	mRNA	No	2.59398	9.65475	Both	S					pp21
MORF4L2	Mostly S		0.56		S	S or S+U and VE		102930425	102943086	mRNA	No	13.1582	13.7697	Both	S		E
LOC340544	VE		0.44					102942211	102947484	ncRNA	No	0.636914	0.937563	Both	S					MORF4L2-AS1
GLRA4	VE				VE			102962271	102983552	mRNA	No	0.0159127	0.0193619	Neither	S
TMEM31	No call							102965836	102968960	mRNA	No	0.0439335	0.0741706	Neither	S			Female Bias
PLP1	Mostly S		0.11		VE			103031438	103047547	mRNA	No	0.00852217	0.174249	Fibroblast Only	S					None	PMD, SPG2
RAB9B	Mostly S		0.11			S or S+U and VE and U		103031503	103087212	mRNA	No	0.0379519	0.163185	Fibroblast Only	S				Y pseudogene	None
MIR1256	No call							103139054	103139097	miRNA	No	0	0	Neither	Boundary
AK026512	Mostly E					E or E+U and VE		103172239	103174131	ncRNA	No	0.763943	1.49652	Both	E
AK090973	No call							103173478	103187485	ncRNA	No	0.394653	0.222458	Both	Boundary
TMSB15B	Mostly S		0			S or S+U and VE and U		103173478	103220563	mRNA	No	0.300714	0.451234	Both	S					MGC39900
H2BFXP	No call							103230501	103232785	ncRNA	No	0	0.315581	Fibroblast Only	S
H2BFWT	No call							103265718	103268256	mRNA	No	0	0	Neither	S
H2BFM	No call							103294515	103297021	mRNA	No	0	0	Neither	S
H2BFXP	No call							103315218	103317502	ncRNA	No	0	0.315581	Fibroblast Only	S
MCART6	Mostly S		0		S	S or S+U and VE		103343897	103401708	mRNA	No	0.691068	0.764432	Both	S		S		Y pseudogene	DKFZp686O1267, LOC401612
ZCCHC18	Mostly S					S or S+U and VE		103357106	103360533	mRNA	No	0.162871	1.45747	Both	S
LOC286437	No call							103366999	103369317	ncRNA	No	2.22209	2.09894	Both	S
FAM199X	S		0		S	all F S		103411155	103440582	mRNA	No	1.12995	2.19223	Both	S		S			CXORF39, FLJ11643, LOC139231, FLJ21191
ESX1	No call					too much U		103494718	103499599	mRNA	No	0	0.0105505	Neither	S				Y pseudogene
IL1RAPL2	Discordant				VE	S or S+U and VE and U		103810995	105011822	mRNA	No	0.00206558	0.00782801	Neither	S
TEX13A	No call							104463610	104465358	mRNA	No	0	0	Neither	S
NRK	S				S	too much U		105066535	105202602	mRNA	No	0.00154713	0.190596	Fibroblast Only	S
SERPINA7	No call							105277189	105282718	mRNA	No	0.00165512	0	Neither	S						Thyroxine-Binding Globulin Deficiency
MUM1L1	S		0.11					105412297	105452949	mRNA	No	0.00135087	0	Neither	S					FLJ33516
CXorf57	S		0		S	all F S or S+U		105855159	105922673	mRNA	No	0.18532	0.16288	Both	S		S			FLJ10178
Mir_548	No call							105883043	105883127	miRNA	No	0	0	Neither	S
RNF128	S					all F S or S+U		105937067	106040246	mRNA	No	0.000709658	0.172723	Fibroblast Only	S
TBC1D8B	S		0		S	too much U		106045918	106119377	mRNA	No	0.12472	1.37252	Both	S		S		Y pseudogene	FLJ20298
MORC4	Mostly S		0		VE	all F S or S+U		106057100	106243474	mRNA	No	0.050632	1.12301	Fibroblast Only	S		S		Y pseudogene	ZCWCC2
RIPPLY1	S		0					106143292	106146561	mRNA	No	0.00279902	0.102385	Fibroblast Only	S		S			LOC92129
CLDN2	S		0.11					106143393	106174091	mRNA	No	0.00208703	0.0964746	Neither	S					None
RBM41	Mostly S		0		S	S or S+U and VE and U		106305117	106362057	mRNA	No	0.597478	0.684311	Both	S					FLJ11016, AI650369
NUP62CL	Mostly S				VE	all F S or S+U		106366656	106449670	mRNA	No	0.131314	0.04064	Lymphoblast only	S
CXorf41	S					all F S or S+U		106449861	106487473	mRNA	No	0.00146005	0.0013694	Neither	S
KIAA1817	VE		0.56					106843634	106848479	mRNA	No	0.0113324	0.531442	Fibroblast Only	S					CAG24, FRMPD3 (aliases)
PRPS1	S		0.11			too much U		106871653	106894256	mRNA	No	1.73103	3.85553	Both	S					None	Hereditary hearing loss and deafness, CMTX5, Phosphoribosylpyrophosphate synthetase superactivity, ARTS
TSC22D3	Mostly S		0		VE	all F S or S+U		106956451	106959711	mRNA	No	6.75023	8.89256	Both	S		S			DSIPI
MID2	Mostly S		0		VE	all F S or S+U		107069083	107174867	mRNA	No	0.00285525	0.110284	Fibroblast Only	S		S		Y pseudogene	FLJ37392, FLJ41813	MRX101
BC070370	No call							107173842	107174868	mRNA	No	0.00891218	0.852605	Fibroblast Only	S
TEX13B	No call							107224093	107225600	mRNA	No	0	0	Neither	S
VSIG1	No call							107288199	107322414	mRNA	No	0.00936253	0.0075268	Neither	S				Y pseudogene
PSMD10	S		0.11		S	all F S or S+U		107327434	107334874	mRNA	No	4.48354	6.27143	Both	S					None
ATG4A	Mostly S		0.11		S	S or S+U and VE		107334898	107397901	mRNA	No	0.446861	0.747627	Both	S				Y pseudogene	APG4A, AUTL2
COL4A6	Mostly VE		0.33		VE	S or S+U and VE and U		107386779	107682704	mRNA	No	0.0605288	0.135937	Fibroblast Only	S					None	DFNX6
COL4A5	S				S	too much U		107825721	107940775	mRNA	No	0.00342072	1.12702	Fibroblast Only	S				Y pseudogene		ATS
IRS4	Mostly S					S or S+U and VE and U		107975726	107979607	mRNA	No	0.00471551	0.0331706	Neither	S				Y pseudogene
GUCY2F	VE				VE			108616134	108719250	mRNA	No	0.00142018	0.00199802	Neither	S				Y pseudogene
NXT2	Mostly S		0.22	S	S	S or S+U and VE and U		108779009	108787927	mRNA	No	1.3936	1.69785	Both	S					P15-2
KCNE1L	S		0					108866928	108868393	mRNA	No	0.187302	0.386481	Both	S					None
ACSL4	S		0		S	all F S		108884563	108976621	mRNA	No	1.03907	1.78538	Both	S	S	S			FACL4	MRX63
TMEM164	S		0.22		S	all F S or S+U		109245862	109421016	mRNA	No	0.265719	0.356557	Both	S	S				FLJ22679, RP13-360B22.2, Hs.425072
Mir_652	No call							109298556	109298654	miRNA	No	0	0	Neither	S
MIR3978	No call							109325345	109325446	miRNA	No	0.179467	0	Lymphoblast only	S
AMMECR1	S		0.22		S	all F S		109437413	109683461	mRNA	No	0.153484	0.292968	Both	S					Hs.61094
SNORD96B	No call							109468216	109468288	snoRNA	No	0.125381	0	Lymphoblast only	S
RGAG1	VE				VE			109602043	109699562	mRNA	No	0.0274997	0.0406693	Neither	S
Mir_633	No call							109657139	109657216	miRNA	No	0	0	Neither	S
TDGF1P3	No call							109763539	109766249	ncRNA	No	0	0	Neither	S
CHRDL1	S		0.11		S	too much U		109917083	110039286	mRNA	No	0.00134816	0.0434131	Neither	S					NRLN1
PAK3	Mostly S		0.22		VE	S or S+U and VE and U		110187512	110464173	mRNA	No	0.00165415	0.0575279	Neither	S					None	MRX30
AF070581	No call							110367492	110372431	ncRNA	No	0.018528	1.86115	Fibroblast Only	S
CAPN6	S				S			110488326	110513774	mRNA	No	0.000719306	0.00505986	Neither	S
DCX	S				S			110537006	110655460	mRNA	No	0.00108176	0.00217413	Neither	S						LISX1
DKFZp686D0853	No call							110754889	110765627	ncRNA	No	0	0.0311759	Neither	Boundary
ALG13	VE		0.56		VE	E or E+U and VE and U		110924345	111003875	mRNA	No	1.13566	1.63788	Both	Boundary					MDS031, GLT28D1, MYCL2, FLJ23018, CXorf45	Carbohydrate-deficient glycoprotein syndrome, CDG1S
TRPC5	VE		0.44		VE			111017541	111326004	mRNA	No	0.00682461	0.0286371	Neither	Boundary				Y pseudogene	None
LOC100329135	No call							111119278	111147213	mRNA	No	0.00884614	0.00553129	Neither	Boundary
ZCCHC16	E				E			111326252	111700473	mRNA	No	0.001174	0.00412916	Neither	E
LHFPL1	Discordant		0.22		VE			111873878	111923375	mRNA	No	0.0316201	0.253385	Fibroblast Only	Boundary					None
AMOT	S		0		S	too much U		112018104	112084043	mRNA	No	0.432517	0.699888	Both	S		S			None
MIR4329	No call							112023945	112024016	miRNA	No	0	0	Neither	Boundary
U6	No call							112162359	112162458	snRNA	No	0	0.247632	Fibroblast Only	Boundary
HTR2C	Mostly E					E or E+U and VE		113818550	114144624	mRNA	No	0.0121822	0.00774012	Neither	E
SNORA35	No call							113865258	113865386	snoRNA	No	0	0	Neither	Boundary
MIR764	No call							113873917	113874002	miRNA	No	0	0	Neither	Boundary
MIR1912	No call							113886018	113886098	miRNA	No	0	0	Neither	Boundary
MIR1264	No call							113887129	113887198	miRNA	No	0	0	Neither	Boundary
MIR1298	No call							113949649	113949761	miRNA	No	0	0	Neither	Boundary
MIR1911	No call							113997743	113997823	miRNA	No	0	0	Neither	Boundary
MIR448	No call							114058016	114058127	miRNA	No	0	0	Neither	Boundary
IL13RA2	No call							114238537	114252207	mRNA	yes	0	0.0226058	Neither	Boundary
LRCH2	Discordant		0		VE	too much U		114345182	114468635	mRNA	No	0.00548632	0.309159	Fibroblast Only	Boundary		S			KIAA1495
SNORA35	No call							114360878	114361007	snoRNA	No	0	0	Neither	Boundary
RBMXL3	No call							114423962	114427431	mRNA	No	0.0052754	0.00742181	Neither	Boundary
LUZP4	No call							114524291	114542121	mRNA	yes	0.00205324	0	Neither	Boundary
AK127380	No call							114752496	114797058	ncRNA	No	0.00472398	0.0970899	Neither	Boundary
PLS3	Mostly VE		0.44		VE	all F E or E+U		114795176	114885179	mRNA	No	0.0698634	1.8436	Fibroblast Only	Boundary				Y pseudogene	Hs.333016	BMND18
LOC642776	No call					too much U		115033603	115085422	mRNA	No	0.057757	0.0029819	Neither	Boundary
AGTR2	S				S			115301957	115306225	mRNA	No	0.0171521	0	Neither	S				Y pseudogene
SLC6A14	No call							115567746	115592625	mRNA	No	0.00183939	0.00207023	Neither	S						BMIQ11
CXorf61	No call							115592851	115594137	mRNA	yes	0	0	Neither	S
KLHL13	Mostly S		0.11		VE	S or S+U and VE		117031775	117251303	mRNA	No	0.026475	0.133972	Fibroblast Only	S					BKLHD2
WDR44	S		0		S	all F S or S+U		117480035	117583923	mRNA	No	0.278842	0.886477	Both	S		S		Y pseudogene	DKFZp686L20145
MIR1277	No call							117520356	117520434	miRNA	No	0	0	Neither	S
DOCK11	Mostly S		0.33		S	all F S		117629871	117820123	mRNA	No	0.334259	0.290088	Both	S				Y pseudogene	None
IL13RA1	Mostly S		0		VE	all F S		117861558	117928496	mRNA	No	0.0727423	1.65512	Fibroblast Only	S		S		Y pseudogene	None
SNORA35	No call							117872017	117872145	snoRNA	No	0	0	Neither	S
ZCCHC12	S					all F S or S+U		117957786	117960931	mRNA	No	0	0.114606	Fibroblast Only	S
AK057519	S					all F S		117973518	117991683	ncRNA	No	0.00251921	0	Neither	S
LONRF3	Mostly S		0		VE	all F S		118108712	118151949	mRNA	No	0.023497	0.00416938	Neither	S		S		Y pseudogene	RNF127
KIAA1210	VE				VE			118212597	118284542	mRNA	No	0.00178105	0.00214775	Neither	S
PGRMC1	S		0		S	all F S or S+U		118370210	118378429	mRNA	No	2.43964	6.74859	Both	S		S			None
SLC25A43	Mostly S		0.33		S	S or S+U and VE		118533257	118588437	mRNA	No	0.642244	0.995032	Both	S					LOC203427, FLJ33985
Y_RNA	No call							118590520	118590621	ncRNA	No	0	0	Neither	S
SLC25A5-AS1	No call							118599995	118603083	ncRNA	No	4.33492	1.95925	Both	S
AK094280	S					all F S or S+U		118599996	118602225	ncRNA	No	0.430962	0.18478	Both	S
BC028211	Mostly S					S or S+U and VE		118599996	118603061	ncRNA	No	4.36744	1.97395	Both	S
SLC25A5	S		0					118602362	118605359	mRNA	No	63.0714	15.7718	Both	S		S			ANT2
CXorf56	Mostly S		0.22		S	S or S+U and VE and U		118672111	118699397	mRNA	No	0.535007	0.949471	Both	S				Y pseudogene	FLJ22965
UBE2A	S		0		S	all F S		118708498	118718379	mRNA	No	4.82092	7.18508	Both	S		S			HHR6A	MRXSN
NKRF	S		0		S	all F S		118722299	118739846	mRNA	No	2.10252	1.56888	Both	S		S		Y pseudogene	NRF; ITBA4
SEPT6	Mostly S		0	S	VE	S or S+U and VE and U		118749687	118827333	mRNA	No	#N/A	-		S	S	S			KIAA0128, Hs.178536
MIR766	No call							118780700	118780811	miRNA	No	0.817215	0.229944	Both	S
SOWAHD	S					all F S		118892575	118894165	mRNA	No	1.13331	0.307555	Both	S				Y pseudogene	ANKRD58
RPL39	S		0		S	all F S or S+U		118920468	118925606	mRNA	No	8.71823	1.80912	Both	S		S		Y pseudogene	None
SNORA69	No call							118921315	118921447	snoRNA	No	0.756999	3.29182	Both	S
UPF3B	S		0.22		S	all F S or S+U		118967988	118986991	mRNA	No	1.37938	1.68448	Both	S					None	MRXS14
RNF113A	S		0			all F S or S+U		119004494	119005791	mRNA	No	25.6462	16.4284	Both	S	S			Y pseudogene	ZNF183
NDUFA1	S				S	all F S		119005733	119010629	mRNA	No	13.3115	3.52358	Both	S		S		Y pseudogene		Mitochondrial complex I deficiency
AKAP14	Mostly S		0		VE			119029935	119054679	mRNA	No	0.00924713	0.00312229	Neither	S		S			AKAP28
NKAP	Mostly S		0.11		S	S or S+U and VE		119059012	119077735	mRNA	No	0.809988	1.43596	Both	S				Y pseudogene	FLJ22626
AK123976	No call							119170200	119280760	ncRNA	No	0.0795566	0.00372698	Neither	S
RHOXF2	S		0.11					119206228	119211707	mRNA	yes	0	0	Neither	S					PEPP-2~
RHOXF1	No call							119243024	119249847	mRNA	No	0.0791348	0	Neither	S
RHOXF2B	No call							119292466	119297945	mRNA	No	0.0116915	0	Neither	S
NKAPP1	Mostly S		0.33			all F S or S+U		119370308	119379122	ncRNA	No	0.323957	0.157765	Both	S					FLJ36576
ZBTB33	S		0		S	all F S or S+U		119384606	119392251	mRNA	No	6.13499	3.91728	Both	S	S	S		Y pseudogene	ZNF-kaiso
FAM70A	Mostly S		0		VE	all F S		119392504	119445391	mRNA	No	0.0730314	0.0111998	Neither	S		S			FLJ20716
ATP1B4	No call							119495939	119517104	mRNA	No	0	0.00486699	Neither	S				Y pseudogene
LAMP2	Mostly S		0		S	S or S+U and VE		119560002	119603204	mRNA	No	1.39083	3.66845	Both	S	S	S			stSG42843	Danon disease
CUL4B	Mostly S		0.44		S	all F S or S+U		119658445	119709684	mRNA	No	1.34988	2.96791	Both	S		E		Y pseudogene	KIAA0695	(MRXC; MRXS15; MRXSC
MCTS1	S		0.22		S	all F S or S+U		119737743	119755016	mRNA	No	2.70123	3.34109	Both	S				Y pseudogene	None
C1GALT1C1	S		0			all F S or S+U		119759528	119764005	mRNA	No	3.92439	5.67639	Both	S		S		Y pseudogene	C1GALT2	TNPS
CT47B1	No call							120006451	120009779	mRNA	yes	0.00274942	0.0154723	Neither	S
CT47A11	No call							120011344	120114778	mRNA	yes	#N/A	0		S							There is multiple copies of CT47A11 here. Each is around 3 kb long.
CT47A1	No call							120011344	120119638	mRNA	yes	#N/A	0		S							There are multiple copies of CT47A1 here, each is around 3 kb long
CT47A7	No call							120087136	120090454	mRNA	yes	0	0	Neither	S
CT47A6	No call							120092019	120095337	mRNA	yes	0	0	Neither	S
GLUD2	S		0					120181461	120183796	mRNA	No	11.5155	10.2199	Both	S					GLUD1
Mir_548	No call							120466405	120466489	miRNA	No	0	0	Neither	S
GRIA3	Mostly S				VE	all F S or S+U		122318095	122624766	mRNA	No	0.00567067	0.00251934	Neither	S		E				MRXSW
mir-220	No call							122695945	122696055	miRNA	No	0	0.46403	Fibroblast Only	S
THOC2	S		0		S	all F S or S+U		122734411	122866904	mRNA	No	0.861647	1.54199	Both	S		S		Y pseudogene
Mir_584	No call							122762640	122762760	miRNA	No	0.212856	0	Lymphoblast only	S
XIAP	S		0		S	all F S or S+U		122993661	123047829	mRNA	No	1.0694	1.57653	Both	S		S			BIRC4	XLP1, XLP2
STAG2	Mostly S		0		S	S or S+U and VE and U		123094474	123236505	mRNA	No	0.884272	1.066	Both	S		S		Y pseudogene	None
SH2D1A	VE				VE			123480131	123507010	mRNA	No	0.00476709	0	Neither	S						XLP1
ODZ1	Discordant		0.11		VE			123509755	124097666	mRNA	No	0.00084069	0.00280354	Neither	S				Y pseudogene	None
LOC100129520	No call							124453968	124456950	mRNA	No	0.00613665	0	Neither	S
DCAF12L2	S					all F S or S+U		125297481	125300080	mRNA	No	0.00704062	0	Neither	S
DCAF12L1	No call							125683365	125686842	mRNA	No	0.00263163	0	Neither	S				Y pseudogene	WDR40B
CXorf64	No call							125953746	125955768	mRNA	No	0.0588169	0	Neither	S
ACTRT1	No call							127184940	127186382	mRNA	No	0.0063429	0	Neither	S				Y pseudogene
SMARCA1	Mostly S		0		VE	all F S		128580477	128657460	mRNA	No	0.00546905	2.02426	Fibroblast Only	S		S		Y pseudogene	None
SNORD112	No call							128652552	128652624	snoRNA	No	0.125381	0	Lymphoblast only	S
OCRL	S		0		S	too much U		128674251	128726530	mRNA	No	0.209737	2.71478	Both	S	S	S			None	OCRL, Dent disease 2
APLN	Mostly S		0		VE	all F S		128779235	128788933	mRNA	No	0.0821007	0.54168	Fibroblast Only	S		S			None
XPNPEP2	Discordant		0.11		VE			128872945	128903525	mRNA	No	0.0185564	0.00589503	Neither	S					None	AEACEI
SASH3	S		0.11		S			128913891	128929176	mRNA	No	16.5117	0.00505437	Lymphoblast only	S	S			Y pseudogene	CXorf9, SLY
ZDHHC9	S		0		S	all F S or S+U		128937263	128978124	mRNA	No	0.451122	2.42587	Both	S		S			None	MRXSR
UTP14A	Mostly S		0.33		S	all F S or S+U		129040096	129063738	mRNA	No	1.257	2.29401	Both	S					SDCCAG16
BCORL1	S		0		S			129139163	129192058	mRNA	No	0.183589	0.468373	Both	S		S		Y pseudogene	FLJ11362
ELF4	S		0		S			129198894	129244688	mRNA	No	2.57206	2.12069	Both	S		S			Hs.271940
AIFM1	S		0		S	all F S or S+U		129263337	129299861	mRNA	No	1.28227	2.06453	Both	S		S		Y pseudogene	PDCD8, Hs.424932
RAB33A	S				S	all F S or S+U		129305772	129318844	mRNA	No	1.17552	0.372328	Both	S
ZNF280C	Mostly S				VE	all F S or S+U		129336672	129402922	mRNA	No	0.208336	0.75841	Both	S
SLC25A14	S		0		S	all F S		129473927	129507335	mRNA	No	0.292866	1.15475	Both	S		S		Y pseudogene	BMCP1
GPR119	No call							129518318	129519511	mRNA	No	0.00766567	0	Neither	S				Y pseudogene
RBMX2	S		0		S	all F S or S+U		129535942	129547317	mRNA	No	1.99936	2.06011	Both	S		S		Y pseudogene	CGI-79
BC043223	Mostly S					S or S+U and VE		129611042	129658231	ncRNA	No	0.0737035	0.556114	Fibroblast Only	S
FAM45A	No call							129628914	129631421	mRNA	No	1.35394	10.4432	Both	S
ENOX2	Mostly S		0.33		S	all F S or S+U		129757356	130037208	mRNA	No	0.0709715	0.15718	Fibroblast Only	S				Y pseudogene	COVA1, APK1
ARHGAP36	No call							130192215	130223857	mRNA	No	0.00173551	0.00244165	Neither	S				Y pseudogene
IGSF1	S				S			130407482	130712873	mRNA	No	0.00170833	0.00227691	Neither	S						CHTE
OR13H1	No call							130678047	130678974	mRNA	No	0	0	Neither	S				Y pseudogene
FIRRE	VE				VE			130836677	130964671	ncRNA	No	0.226755	0.0150906	Lymphoblast only	S	VE				LOC286467		Has female specific CTCF binding sites
5S_rRNA	No call							131072873	131072984	rRNA	No	0	0.214614	Fibroblast Only	S
MST4	Mostly S		0		S	S or S+U and VE		131157244	131209971	mRNA	No	1.40899	0.0278402	Lymphoblast only	S	S	S		Y pseudogene	STK26
FRMD7	VE				VE			131211020	131262050	mRNA	No	0.00358716	0	Neither	S				Y pseudogene		NYS1, XIPAN
RAP2C	S		0			all F S or S+U		131337052	131353475	mRNA	No	2.86276	3.08122	Both	S		S			Hs.119889
AK095439	Mostly S					S or S+U and VE		131352649	131566839	ncRNA	No	0.296517	0.0654089	Lymphoblast only	S
MBNL3	Mostly S		0		S	S or S+U and VE		131503342	131623996	mRNA	No	0.561663	0.115476	Both	S		S			CHCR, FLJ38120, Hs.291319, Hs.287979, Hs.148401
U6	No call							131714144	131714251	snRNA	No	0	0.247632	Fibroblast Only	S
HS6ST2	Discordant				E	all F S		131760037	132095423	mRNA	No	0.00139185	0.00276437	Neither	S
Mir_548	No call							131791765	131791849	miRNA	No	0	0	Neither	S
USP26	No call							132159053	132231135	mRNA	No	0.00101581	0.000714556	Neither	S				Y pseudogene
TFDP3	No call							132350696	132352376	mRNA	yes	0.0326692	0.0306409	Neither	S
GPC4	Mostly S		0.22	S	VE	all F S or S+U		132435063	132549205	mRNA	No	0.0167591	0.166964	Fibroblast Only	S					None	SGBS1, WT1
GPC3	S				S	all F S or S+U		132669775	133119673	mRNA	No	0.076555	0.0131659	Neither	S						SGBS1, WT1
MIR363	No call							133303407	133303482	miRNA	No	0.240863	0	Lymphoblast only	S
MIR92A2	No call							133303567	133303642	miRNA	No	0	0	Neither	S
MIR19B2	No call							133303700	133303796	miRNA	No	0	0	Neither	S
DM119510	No call							133303712	133303735	miRNA	No	0	0	Neither	S
MIR20B	No call							133303838	133303907	miRNA	No	0	0	Neither	S
MIR18B	No call							133304070	133304141	miRNA	No	0	0	Neither	S
MIR106A	No call							133304227	133304308	miRNA	No	0	0	Neither	S
CCDC160	S					all F S		133371076	133379808	mRNA	No	0.00209614	0.014745	Neither	S
PHF6	S		0.22		S	all F S or S+U		133507341	133562822	mRNA	No	1.00598	1.23101	Both	S				Y pseudogene	None	BFLS
HPRT1	S		0.2		S	all F S or S+U		133594174	133634698	mRNA	No	0.717996	1.16932	Both	S				Y pseudogene	None	LNS
MIR450B	No call							133674214	133674292	miRNA	No	0	0.977988	Fibroblast Only	S
MIR450A1	No call							133674370	133674461	miRNA	No	0	0.279931	Fibroblast Only	S
MIR450A2	No call							133674537	133674637	miRNA	No	0	0.509974	Fibroblast Only	S
MIR542	No call							133675370	133675467	miRNA	No	0	0.262793	Fibroblast Only	S
MGC16121	VE				VE			133677406	133680660	ncRNA	No	0.0843577	18.3638	Fibroblast Only	S
MIR503	No call							133680357	133680428	miRNA	No	0	22.8922	Fibroblast Only	S
MIR424	No call							133680643	133680741	miRNA	No	0.0924526	6.24332	Fibroblast Only	S
LOC100506757	S					all F S		133684053	133694428	ncRNA	No	0.00441057	0.116656	Fibroblast Only	S					LINC00629
PLAC1	VE		0.33		VE			133699872	133792513	mRNA	yes	0.00997856	0.0225173	Neither	S					None
Mir_1302	No call							133830061	133830113	miRNA	No	0	0	Neither	S
FAM122B	S		0.33			all F S or S+U		133903595	133931262	mRNA	No	2.42582	3.14707	Both	S				Y pseudogene	LOC159090
FAM122C	Mostly S		0		S	S or S+U and VE and U		133930442	133988641	mRNA	No	0.558447	0.534101	Both	S		S		Y pseudogene	LOC159091, RP3-473B4.1, Hs.269127
MOSPD1	S		0.22		S	all F S or S+U		134021661	134049297	mRNA	No	0.248716	1.87489	Both	S					DJ473B4, T91371
CXorf69	Mostly S		0			S or S+U and VE and U		134124967	134126503	mRNA	No	0.0297749	8.29413	Fibroblast Only	S		S			BC008642, LOC644538, SMIM10
FAM127C	No call					too much U		134154533	134156566	mRNA	No	0.0854982	16.726	Fibroblast Only	S
FAM127A	S		0			all F S or S+U		134166332	134167575	mRNA	No	10.6685	33.5999	Both	S					CXX1
FAM127B	S		0			all F S or S+U		134184962	134186221	mRNA	No	4.6999	26.8779	Both	S		E			DKFZP564B147
LINC00087	S					all F S or S+U		134229014	134232733	ncRNA	No	0.0123022	1.70307	Fibroblast Only	S
LOC100129515	No call							134252881	134254405	ncRNA	No	0.00600184	0	Neither	S
BC061642	No call							134254548	134257529	mRNA	No	0.00306935	0	Neither	S
CXorf48	No call							134290460	134305751	mRNA	yes	0.0131678	0.013473	Neither	S
DKFZp451F083	Mostly S					S or S+U and VE and U		134382887	134477957	mRNA	No	0.55983	0.553697	Both	S
BC029787	S					all F S or S+U		134382887	134478012	mRNA	No	0.560276	0.553377	Both	S
ZNF75D	S		0	S	S			134419722	134429965	mRNA	No	1.76105	3.05706	Both	S		S			None
ZNF449	S		0		S	all F S or S+U		134477627	134497338	mRNA	No	0.638449	1.7899	Both	S		S		Y pseudogene	FLJ23614
AB062081	No call							134540020	134540794	ncRNA	No	0	0	Neither	S
LINC00086	S					all F S or S+U		134555867	134560225	ncRNA	No	0.008399	0.259959	Fibroblast Only	S
5S_rRNA	No call							134562092	134562210	rRNA	No	0	0.214614	Fibroblast Only	S
DDX26B	S		0		S	all F S or S+U		134654554	134716460	mRNA	No	1.5904	0.983854	Both	S		S		Y pseudogene	FLJ39225
CT45A1	No call							134847184	134856988	mRNA	yes	0.00186697	0.00525317	Neither	S
CT45A2	No call							134866213	134874268	mRNA	yes	0	0	Neither	S
CT45A4	No call							134866213	134936735	mRNA	yes	0.000129785	0.000730363	Neither	S							There are 2 copies of CT45A4 in this region. They are on opposite strands, each is 8 kb
CT45A3	No call							134883487	134891519	mRNA	yes	0	0	Neither	S
CT45A5	No call							134945650	134971244	mRNA	yes	0	0	Neither	S
CT45A6	No call							134963214	134971244	mRNA	yes	0	0	Neither	S
SAGE1	No call							134975784	134995220	mRNA	yes	0.000470896	0.00529993	Neither	S			Female Bias
MMGT1	S				S	all F S		135044230	135056188	mRNA	No	2.00981	3.68464	Both	S	S
SLC9A6	S		0		S	all F S or S+U		135067585	135129428	mRNA	No	0.289485	1.06148	Both	S		S			NHE-6	MRXSCH
FHL1	Mostly S		0.11	S	VE	all F S or S+U		135228860	135293518	mRNA	No	0.0113244	1.3367	Fibroblast Only	S					SLIM1, Hs.205436	XMPMA; Myopathy, reducing body, X-linked, childhood-onset; Myopathy, reducing body, X-linked, early-onset, severe; SPM
MAP7D3	S		0		S	all F S		135295378	135338641	mRNA	No	0.478119	2.01796	Both	S		S			FLJ12649
GPR112	E				E			135383121	135499047	mRNA	No	0.00221069	0.00377662	Neither	E				Y pseudogene
BRS3	VE		0.56					135570124	135574598	mRNA	No	0.0143172	0	Neither	Boundary					None
HTATSF1	S		0	S	S	all F S or S+U		135579237	135594503	mRNA	No	2.25418	2.11704	Both	S		S		Y pseudogene	None
VGLL1	E				E			135614310	135638966	mRNA	No	0.00222723	0.00208896	Neither	E
MIR934	No call							135633036	135633119	miRNA	No	0	0	Neither	Boundary
LOC100128420	No call							135721701	135724588	ncRNA	No	0.0158463	0	Neither	Boundary
CD40LG	VE		0.44		VE			135730335	135742549	mRNA	No	0.0247272	0.0126502	Neither	Boundary	S			Y pseudogene	TNFSF5	HIGM1
ARHGEF6	S		0		S	all F S or S+U		135747711	135863503	mRNA	No	0.579002	0.249323	Both	S		S			None	MRX46
U6	No call							135856157	135856264	snRNA	No	0	0.247632	Fibroblast Only	S
RBMX	S		0			all F S or S+U		135951352	135962939	mRNA	No	11.2404	9.0898	Both	S		S		Y homolog	HNRPG
SNORD61	No call							135961357	135961430	snoRNA	No	0.37106	0.348023	Both	S
AK055694	S					all F S or S+U		135991553	136075814	ncRNA	No	0.174558	0.0382048	Lymphoblast only	S
GPR101	S					all F S or S+U		136112306	136113833	mRNA	No	0	0	Neither	S				Y pseudogene
ZIC3	S					all F S or S+U		136648345	136654259	mRNA	No	0.00464217	0	Neither	S						HTX1; VACTERLX
U6	No call							136770049	136770153	snRNA	No	0	0.247632	Fibroblast Only	S
LOC158696	No call							137696891	137699799	ncRNA	No	0.00314638	0	Neither	S
FGF13	Mostly S				VE	all F S or S+U		137713733	138287185	mRNA	No	0.00181954	0.00278441	Neither	S
MIR504	No call							137749871	137749954	miRNA	No	0	0	Neither	S
LOC100129662	Mostly S					all 4 states		137794268	137798763	ncRNA	No	0	0	Neither	S
JA536283	No call							137922164	137922184	ncRNA	No	0	0	Neither	S
SRD5A1P1	No call							138528977	138531132	ncRNA	No	0.365094	0.322518	Both	S
F9	No call							138612894	138645617	mRNA	No	0.00251727	0.00314799	Neither	S						Warfarin response, HEMB, THPH8
MCF2	S				S			138663929	138790381	mRNA	No	0.0212801	0.00468423	Neither	S
Mir_548	No call							138681375	138681459	miRNA	No	0	0	Neither	S
ATP11C	S		0.11		S			138808504	138914447	mRNA	No	0.474815	1.4736	Both	S				Y pseudogene	FLJ34233, Hs.112784
MIR505	No call							139006306	139006390	miRNA	No	0.10768	0	Lymphoblast only	S
CXorf66	S				S			139037883	139047677	mRNA	No	0.00467219	0	Neither	S
U7	No call							139533312	139533373	snRNA	No	0	0	Neither	S
SOX3	S					all F S or S+U		139585151	139587225	mRNA	No	0	0.0620571	Neither	S				Y homolog		X-linked mental retardation with panhypopituitarism, PHPX
RP1-177G6.2	No call							139791923	139796996	ncRNA	No	0.00360773	0.106588	Fibroblast Only	S
AK054921	No call							139863223	139866517	ncRNA	No	0.00277779	10.3093	Fibroblast Only	S
CDR1	S		0.22		S			139865424	139866723	mRNA	No	0.00704062	25.8924	Fibroblast Only	S					None
MIR320D2	No call							140008336	140008384	miRNA	No	0	0	Neither	S
SPANXB2	No call							140084755	140097876	mRNA	yes	0	0	Neither	S							There is 2 copies of SPANXB2. Each is about 1 kb.
LDOC1	S		0.11			all F S or S+U		140269930	140271310	mRNA	No	1.06705	22.4529	Both	S	S				BCUR1
SPANXC	No call							140335595	140672860	mRNA	yes	0.00233389	0.00694877	Neither	S
SPANXA2-OT1	No call							140590842	140738069	ncRNA	yes	0.000621676	0.00507279	Neither	S
SPANXA1	No call							140671795	140678899	mRNA	yes	0.00128822	0	Neither	S							There is 2 copies of SPANXA1 on opposite strands. Each is around 1 kb.
BC042039	No call							140713995	140714861	mRNA	No	0	0	Neither	S
SPANXE	No call							140785567	140786655	mRNA	yes	0	0.0709468	Neither	S
MAGEC3	No call							140926101	140985618	mRNA	yes	0.00107648	0.0112503	Neither	S
MAGEC1	No call							140991641	140997187	mRNA	yes	0	0	Neither	S
MAGEC2	No call							141290127	141293076	mRNA	yes	0	0.00873006	Neither	S
SPANXN4	No call							142113703	142122066	mRNA	yes	0	0	Neither	S
7SK	No call							142178132	142178463	snRNA	No	0	0	Neither	S
SPANXN3	No call							142596563	142605307	mRNA	yes	0.00418653	0	Neither	S
SLITRK4	S					all F S or S+U		142710594	142723019	mRNA	No	0.0250439	0.00414513	Neither	S			Male Bias	Y pseudogene
SPANXN2	No call							142795054	142804516	mRNA	yes	0.000967221	0	Neither	S
UBE2NL	No call							142967172	142968357	mRNA	No	3.61173	0.694872	Both	S	S
SPANXN1	No call							144329106	144337728	mRNA	yes	0	0.00597325	Neither	S
SLITRK2	Mostly S		0.22			S or S+U and VE and U		144899346	144907360	mRNA	No	0.00114196	0	Neither	S				Y pseudogene
CXorf1	No call							144908927	144911370	mRNA	No	0	0	Neither	S
MIR890	No call							145075792	145075869	miRNA	No	0	0	Neither	S
MIR888	No call							145076301	145076378	miRNA	No	0	0	Neither	S
MIR892A	No call							145078186	145078261	miRNA	No	0	0	Neither	S
MIR892B	No call							145078715	145078792	miRNA	No	0	0	Neither	S
MIR891B	No call							145082570	145082649	miRNA	No	0	0	Neither	S
MIR891A	No call							145109311	145109390	miRNA	No	0	0	Neither	S
CXorf51B	No call							145891301	145896249	mRNA	No	0	0	Neither	S							There is 2 copies of CXorf51B here, on opposite strands. Each is about 500 bp long.
MIR506	No call							146312237	146312361	miRNA	No	0	0	Neither	S
MIR507	No call							146312501	146312595	miRNA	No	0	0	Neither	S
MIR508	No call							146318430	146318545	miRNA	No	0.157807	0	Lymphoblast only	S
MIR514B	No call							146331668	146331748	miRNA	No	0	0	Neither	S
MIR509-1	No call							146340277	146342143	miRNA	No	0	0	Neither	S							There are multiple copies of MIR509-1 here. Each is around 100 bp.
MIR510	No call							146353852	146353926	miRNA	No	0	0	Neither	S
MIR514A1	No call							146360764	146360862	miRNA	No	0	0	Neither	S
MIR514A2	No call							146363460	146366246	miRNA	No	0	0	Neither	S							There is 2 copies of MIR514A2 here. Each is around 80bp.
FMR1-AS1	No call							146990948	147003676	ncRNA	No	0.158191	0.149719	Both	S
FMR1	S		0.11	S	S	all F S or S+U		146993468	147032156	mRNA	No	1.44641	2.08551	Both	S				Y pseudogene	None	FXS, FXTAS, FXPOI
FMR1NB	No call							147062848	147108187	mRNA	yes	0.00282619	0.00340807	Neither	S
5S_rRNA	No call							147089619	147089735	rRNA	No	0	0.214614	Fibroblast Only	S
AFF2	Mostly S				VE	all F S		147582138	148082193	mRNA	No	0.0017754	0.00860077	Neither	S				Y pseudogene		FRAXE
IDS	S		0	S	S	all F S or S+U		148560294	148615468	mRNA	No	3.49001	3.48953	Both	S		S		Y pseudogene	None	MPS2
IDS2	No call							148593083	148607803	mRNA	No	0.437686	0.503842	Both	S		S
LOC100131434	No call							148609131	148622504	ncRNA	No	0.6915	1.20931	Both	S
CXorf40A	S		0.22		S	all F S or S+U		148622518	148632086	mRNA	No	1.40702	2.74519	Both	S					LOC347512
MAGEA9B	No call							148663308	148669116	mRNA	yes	0	0.00886682	Neither	S
HSFX2	No call							148674171	148676974	mRNA	No	0	0	Neither	S
HSFX1	No call							148674171	148676974	mRNA	No	0.0032642	-		S				Y homolog
TMEM185A	S		0		S	all F S or S+U		148678215	148854484	mRNA	No	0.0656817	0.144789	Fibroblast Only	S		S			FAM11A~, LW-1
MAGEA11	VE				VE			148769902	148798928	mRNA	yes	0.00346793	0	Neither	S
HSFX2	No call							148855725	148858528	mRNA	No	0	0	Neither	S
MAGEA9	No call							148863592	148869399	mRNA	yes	0	0	Neither	S
MAGEA9B	No call							148867872	148868820	mRNA	yes	0	0.00886682	Neither	S
MAGEA8	VE		0.33					149009940	149014609	mRNA	No	0	0.0165441	Neither	S					None
CXorf40B	S					all F S or S+U		149097722	149106716	mRNA	No	2.38411	5.94955	Both	S
LOC100272228	Mostly S				S	S or S+U and VE and U		149106765	149392815	ncRNA	No	0.156594	0.115511	Both	S
MIR2114	No call							149396238	149396318	miRNA	No	0	0.317947	Fibroblast Only	S
MAMLD1	Mostly S		0	S	VE	all F S or S+U		149529835	149682448	mRNA	No	0.00191916	0.675846	Fibroblast Only	S		S		Y pseudogene	CXorf6, XAP80, Hs.146087	HYSP2
MTM1	S		0		S	all F S or S+U		149737046	149841616	mRNA	No	0.238074	0.356859	Both	S		S			Hs.34079	CNMX
MTMR1	S		0		S	all F S		149861868	149933397	mRNA	No	1.33677	1.86789	Both	S		S		Y pseudogene	M79236, Hs.99402
CD99L2	S		0.11	S	S	too much U		149934808	150067289	mRNA	No	0.391586	0.836671	Both	S					Hs.124981
HMGB3	S		0			all F S		150151762	150159248	mRNA	No	2.58557	6.22257	Both	S		S			None	MCOPS13
MIR4330	No call							150336693	150336798	miRNA	No	0	0	Neither	S
GPR50	No call							150345055	150349937	mRNA	No	0.0074977	0	Neither	S				Y pseudogene
VMA21	S					all F S		150565656	150577836	mRNA	No	2.53823	5.95584	Both	S		S
PASD1	No call							150732006	150845211	mRNA	yes	0.00129361	0.00272993	Neither	S				Y pseudogene
PRRG3	Mostly S					S or S+U and VE and U		150863729	150870063	mRNA	No	0	0.0040653	Neither	S
FATE1	No call							150884507	150891664	mRNA	yes	0.00127868	0.0107937	Neither	S
CNGA2	No call							150903217	150914036	mRNA	No	0.00169183	0.00476039	Neither	S				Y pseudogene
MAGEA4	No call							151080995	151093642	mRNA	yes	0.000723657	0.00203619	Neither	S				Y pseudogene
GABRE	S		0			all F S or S+U		151121595	151143151	mRNA	No	0.00169835	0.592561	Fibroblast Only	S		S		Y pseudogene
MIR452	No call							151128099	151128184	miRNA	No	0	0.598923	Fibroblast Only	S
MAGEA5	No call							151282520	151286411	mRNA	yes	0	0	Neither	S
MAGEA10-MAGEA5	No call							151282520	151307050	mRNA	yes	0.000373112	0.00209969	Neither	S
MAGEA10	No call							151301782	151307050	mRNA	yes	0.00173711	0	Neither	S				Y pseudogene
GABRA3	Discordant				VE	S or S+U and VE		151335633	151619831	mRNA	No	0.000644113	0.00190299	Neither	S
U6	No call							151419043	151419148	snRNA	No	0	0.247632	Fibroblast Only	S
MIR105-1	No call							151560690	151560771	miRNA	No	0	0	Neither	S
Mir_105	No call							151561431	151562213	miRNA	No	0	0	Neither	S							There is 3 copies of Mir_105 here. Each is about 80 bp.
MIR767	No call							151561892	151562001	miRNA	No	0	0	Neither	S
MIR105-2	No call							151562883	151562964	miRNA	No	0	0	Neither	S
GABRQ	S					all F S		151806636	151821825	mRNA	No	0.021692	0.0203452	Neither	S
MAGEA6	No call							151867244	151870814	mRNA	yes	0	0	Neither	S							mageA6 to MageA3 is an inverted repeat
CSAG2	No call							151876742	151877747	mRNA	yes	0	0	Neither	S
CSAG3	No call							151876742	151883038	mRNA	yes	0	0	Neither	S
MAGEA2	No call							151883118	151887095	mRNA	yes	0	0	Neither	S
MAGEA12	No call							151895977	151903184	mRNA	yes	0	0.0142917	Neither	S
CSAG1	No call							151903227	151909518	mRNA	yes	0	0	Neither	S
MAGEA2	No call							151918387	151922364	mRNA	yes	0	0	Neither	S
CSAG3	No call							151922444	151928738	mRNA	yes	0	0	Neither	S
CSAG2	No call							151927733	151928738	mRNA	yes	0	0	Neither	S
MAGEA3	No call							151934651	151938240	mRNA	yes	0	0	Neither	S
CETN2	S		0	S		all F S		151995870	151999301	mRNA	No	2.86425	8.56205	Both	S		S			CALT
NSDHL	S		0		S	all F S or S+U		151999510	152037907	mRNA	No	0.485315	1.39573	Both	S		S			None	Child syndrome; NSDHL-Related Disorders
ZNF185	Mostly S		0.22	S	VE			152082985	152142025	mRNA	No	0.0308499	0.924744	Fibroblast Only	S					None
PNMA5	S		0.11					152157367	152160761	mRNA	No	0.0404395	0	Neither	S				Y pseudogene	KIAA1934
PNMA3	Discordant				VE	all F S		152224765	152228827	mRNA	No	0.155438	0.0697245	Lymphoblast only	S				Y pseudogene
BC030761	No call							152227055	152228822	mRNA	No	0.165662	0.0436997	Lymphoblast only	S
PNMA6A	S		0					152240726	152340107	mRNA	No	0.00153419	0.000518277	Neither	S					None		There is multiple copies of PNMA6A here, on both strands. Each copy is around 2 kb.
PNMA6C	No call							152241445	152242645	mRNA	No	0	0	Neither	S
MAGEA1	No call							152481521	152486116	mRNA	yes	0	0	Neither	S
ZNF275	S		0		S	all F S		152599612	152618384	mRNA	No	5.32065	5.12385	Both	S		S			None
BC018767	No call							152614942	152617045	ncRNA	No	10.6754	13.3297	Both	S
ZFP92	No call							152683780	152687086	mRNA	No	0.210346	0.0700887	Lymphoblast only	S
HAUS7	S				S	all F S or S+U		152710177	152760978	mRNA	No	0.319615	1.35759	Both	S		S
TREX2	S		0					152710177	152713367	mRNA	No	0.903521	2.00154	Both	S				Y pseudogene	HXQ28ORF
BGN	S		0	S				152760346	152775004	mRNA	No	0	6.93781	Fibroblast Only	S	S				None
ATP2B3	Discordant		0		VE			152801579	152848387	mRNA	No	0.00958123	0.0143049	Neither	S		S			None
FAM58A	S		0		S			152853382	152864632	mRNA	No	0.826527	3.23438	Both	S		S			MGC29729	STAR
DUSP9	S		0			all F S or S+U		152907896	152916781	mRNA	No	0.0041201	0.0695576	Neither	S					None
PNCK	S					all F S or S+U		152935187	152952247	mRNA	No	0.0123389	0.0528327	Neither	S				Y pseudogene
SLC6A8	No call							152953751	152962048	mRNA	No	0.136774	10.4684	Both	S				Y pseudogene		CCDS1
BCAP31	Mostly S				S	S or S+U and VE and U		152965946	152990201	mRNA	No	2.13802	2.64587	Both	S		E				DDCH
ABCD1	Mostly S		0.33		S			152990322	153010216	mRNA	No	0.725968	2.85045	Both	S	S				None	ALD
PLXNB3	Discordant		1	S				153029650	153045940	mRNA	No	0.120794	9.45667	Both	S				Y pseudogene	None
SRPK3	S		0					153041810	153051187	mRNA	No	0.532889	4.85525	Both	S				Y pseudogene	STK23, MSSK1
IDH3G	S		0		S			153051220	153059967	mRNA	No	7.15652	10.0183	Both	S		S			IDH
SSR4	S		0			all F S or S+U		153059903	153063967	mRNA	No	40.4052	11.1251	Both	S				Y pseudogene	TRAP delta
PDZD4	Discordant		0		VE	too much U		153067622	153095351	mRNA	No	0.00726152	0.136523	Fibroblast Only	Boundary		S		Y pseudogene	PDZK4
L1CAM	Mostly E		0.89		S	E or E+U and VE		153126970	153151584	mRNA	No	0.0223103	0.954189	Fibroblast Only	E		E			None	HSAS; SPG1; Corpus callosum, partial agenesis of, X-linked
AVPR2	Discordant		1		S			153167984	153172620	ncRNA	No	0.432276	0.0111079	Lymphoblast only	Boundary				Y pseudogene	None	NDI, NSIAD
ARHGAP4	Discordant		0.78	VE	S			153172829	153191714	mRNA	No	5.99881	0.204546	Both	Boundary				Y pseudogene	None
NAA10	Mostly VE		0.56	VE	VE	S or S+U and VE		153195376	153200468	mRNA	No	6.2127	10.9477	Both	Boundary		E			ARD1, TE2, NATD, ARD1A, DXS707	MCOPS1, OGDNS
RENBP	Discordant		0.78		VE	too much U		153200721	153210232	mRNA	No	0.520571	0.0812248	Lymphoblast only	Boundary					None
DL490658	No call							153209600	153209674	ncRNA	No	0.732225	0.343382	Both	Boundary
HCFC1	Mostly VE		0.66	E	VE			153213007	153236819	mRNA	No	6.51186	6.92591	Both	Boundary		E		Y pseudogene	None	MRX3
TMEM187	Mostly VE		0.56	VE	S	too much U		153237990	153248646	mRNA	No	0.594327	1.52729	Both	Boundary				Y pseudogene	CXORF12, ITBA1
MIR3202-1	No call							153246547	153246628	miRNA	No	0	0	Neither	Boundary
MIR3202-2	No call							153246548	153246627	miRNA	No	0	0	Neither	Boundary
IRAK1	Mostly S		0.11	S		S or S+U and VE		153275956	153285342	mRNA	No	10.1747	13.309	Both	S		E			None
MIR718	S					all F S		153285370	153285440	miRNA	No	0.128913	0	Lymphoblast only	S
MECP2	S		0	S	S	all F S or S+U		153287263	153363188	mRNA	No	1.13208	1.30454	Both	S		S		Y pseudogene	None	RTT; AS; Encephalopathy, neonatal severe, due to MECP2 mutations; MRXSL; MRXS13; AUTSX3
OPN1LW	No call							153409724	153424507	mRNA	No	0.00185731	0	Neither	S						CBP; BCM; CBBM
TEX28	No call							153424832	153523796	mRNA	No	0	0.00052046	Neither	S				Y pseudogene			There are multiple copies of TEX28 here. Each is around 20 kb long.
OPN1MW	No call							153448084	153499470	mRNA	No	0	0	Neither	S						CBD;BCM;CBBM	There is 2 copies of OPN1MW here. Each is around 15 kb long.
TKTL1	Discordant		0.11		VE			153524026	153558713	mRNA	No	0.00738811	0.00296975	Neither	S				Y pseudogene	None
FLNA	S		0		S	all F S		153576899	153586723	mRNA	No	33.1672	30.7917	Both	S		S			None	PVNH1; OPD2; MNS; OPD1; FMD; PVNH4; TOD; CIIPX; CVD1; FGS2
EMD	S		0			all F S or S+U		153607596	153609883	mRNA	No	18.4496	17.7957	Both	S				Y pseudogene	STA	EDMD1
AK307233	No call					too much U		153625074	153627178	ncRNA	No	9.71372	6.42313	Both	S
RPL10	S		0		S	all F S or S+U		153626570	153632038	mRNA	No	66.7558	23.2438	Both	S		S		Y pseudogene	QM	AUTS1; AUTSX5
SNORA70	No call							153628621	153628756	snoRNA	No	25.1702	51.5074	Both	S
DQ570720	No call							153628902	153628928	piRNA	No	2741.78	268.029	Both	S
DNASE1L1	S		0	S	S	all F S		153629578	153640427	mRNA	No	2.34261	7.28461	Both	S		S
TAZ	S		0			all F S		153639876	153650063	mRNA	No	3.99874	5.37673	Both	S		E		Y pseudogene	None	MGCA2; DCM
BC009467	S					all F S or S+U		153652727	153656796	ncRNA	No	0.400295	0.512543	Both	S
ATP6AP1	S		0	S	S	all F S		153656977	153664862	mRNA	No	7.84941	10.2381	Both	S	S	S			ATP6S1
GDI1	S		0			all F S or S+U		153665258	153670141	mRNA	No	11.1412	15.3025	Both	S					GDI, XAP4	MRX41
FAM50A	S		0			all F S		153672472	153679002	mRNA	No	5.04939	11.4513	Both	S		S		Y pseudogene	DXS9928E
PLXNA3	S		0		S	all F S or S+U		153686622	153701985	mRNA	No	5.13818	18.9247	Both	S					SEX
LAGE3	S		0			all F S		153705240	153707596	mRNA	No	4.73756	9.04712	Both	S		S			DXS9879E, ITBA2
UBL4A	S		0	S	S	all F S		153712055	153714932	mRNA	No	9.61713	15.8835	Both	S					GdX
SLC10A3	S		0			all F S		153715649	153719002	mRNA	No	6.54396	11.9247	Both	S		S		Y pseudogene	P3
FAM3A	S		0	S		all F S		153733326	153744566	mRNA	No	2.80015	6.09419	Both	S		S			None
G6PD	S		0	S	S	all F S		153759605	153775787	mRNA	No	2.26006	6.22239	Both	S	S	S			None	Susceptibility to malaria; Anemia, nonspherocytic hemolytic, due to G6PD deficiency; susceptibility to Favism
IKBKG	Mostly S		1	S		all F S or S+U		153770458	153793261	mRNA	No	0.49569	1.54043	Both	S					NEMO	IP; HED-ID; Immunodeficiency without anhidrotic ectodermal dysplasia; IMD33; OLEDAID; IPD2
LINC00204A	No call							153799478	153800188	ncRNA	No	0.0514926	0.217331	Fibroblast Only	S
CTAG1A	No call							153813417	153847522	mRNA	yes	0.0115396	0.00151021	Neither	S							There are 2 copies of CTAG1A here on opposite strands. Each copy is around 2 kb long.
LINC00204A	No call							153860738	153861448	ncRNA	No	0.0514926	0.217331	Fibroblast Only	S
CTAG2	No call							153880245	153881853	mRNA	yes	0	13.0129	Fibroblast Only	S
GAB3	Mostly S		0.89		S	all F S or S+U		153903526	153979858	mRNA	No	0.109594	0.211541	Both	S					Hs.290502
DKC1	S		0	S		all F S or S+U		153991030	154005964	mRNA	No	5.47882	6.74579	Both	S		S			CBF5	DKCX; HHS
SNORA36A	No call							153996802	153996932	snoRNA	No	0.698688	2.16252	Both	S
SNORA56	No call							154003272	154003401	snoRNA	No	2.53462	3.764	Both	S
MPP1	S		0	S	S	all F S or S+U		154006958	154033802	mRNA	No	0.573478	2.643	Both	S		S			P55
CXorf68	No call							154051622	154062937	mRNA	No	0.0194121	0.00455173	Neither	S
F8	S		0		S			154064063	154255215	mRNA	No	0.0696685	0.0873038	Neither	S		S		Y pseudogene	None	HEMA
H2AFB3	No call							154113316	154113833	mRNA	No	0.0706781	0	Neither	S
F8A3	No call							154114634	154688276	mRNA	No	0.308182	0.333794	Both	S
MIR1184-1	S		0					154115634	154687276	miRNA	No	0.30926	0.334827	Both	S							There is 3 copies of MIR1184-1 here, there are some on both strands. Each is about 100 bp.
FUNDC2	S		0		S	all F S or S+U		154255063	154285191	mRNA	No	0.805644	0.860764	Both	S		S			HCBP6
MTCP1NB	No call							154289899	154299547	mRNA	No	1.59645	2.39147	Both	S		S
MTCP1	S		0					154292308	154299547	mRNA	No	0.97217	2.29791	Both	S		S			Hs.6917
BRCC3	Mostly S		0.33		S			154299694	154351349	mRNA	No	0.715661	0.938292	Both	S					C6.1A
VBP1	S		0.11	S	S			154444700	154468098	mRNA	No	1.67457	2.04277	Both	S	S				PFD3, H78350
RAB39B	S		0		S			154487525	154493852	mRNA	No	2.14067	0.423259	Both	S		S			None
CLIC2	Mostly S		0.33	S	S			154505499	154563986	mRNA	No	0.401554	0.0739745	Lymphoblast only	S					None	MRXS32
LOC100507404	No call							154576449	154603823	ncRNA	No	0.0538302	0.285054	Fibroblast Only	S
H2AFB2	No call							154610427	154689596	mRNA	No	0.017457	0.0227707	Neither	S							There is 2 copies of H2AFB2 here on opposite strands. Each copy is around 500 bp.
LOC100507404	No call							154696200	154723771	ncRNA	No	0.0538302	0.285054	Fibroblast Only	S
U00684	No call							154697946	154716707	unknown	No	0	0.0137265	Neither	S
TMLHE	S		0	S	S			154718672	154842622	mRNA	No	0.13838	0.244757	Both	S		S			None	TMLHED
SPRY3	S		0					154997450	155012117	mRNA	No	0.112944	0.015802	Lymphoblast only	S	S			PAR2	None
VAMP7	S		0.11		S			155110942	155173433	mRNA	No	0.607239	0	Lymphoblast only	S	S			PAR2	SYBL1
IL9R	S				S			155227245	155240482	mRNA	No	0.284167	0	Lymphoblast only	S			Male Bias	PAR2
WASH1	No call							155249966	155253125	mRNA	No	1.10355	0	Lymphoblast only	S				PAR2
WASH6P	No call							155251978	155255330	mRNA	No	1.08098	0	Lymphoblast only	S				PAR2
DDX11L family member	No call							155255322	155257848	ncRNA	No	#N/A	-		S				PAR2

## Sheet: Column Explanations
Balaton Consensus calls
The consensus XCI status calls from this study. E is escape from, S is subject to and VE is variable escape from XCI
Carrel hybrids
The XCI status calls from the Carrel hybrid study. The number is the percent of Xi hybrid cell lines in which the gene escaped XCI
Carrel SNPs
The XCI status calls from the Carrel SNP study
Cotton AI
The XCI status calls from the Cotton allelic imbalance study
Cotton DNAm
The XCI status calls from the Cotton DNA methylation study. All F S and F E mean that a gene was fully subject or fully escape in all tissues.
U is methylation in the uncallable range between the subject and escape training sets. Too much U means that too many tissues gave uncallable calls for a confident XCI status call to be made. All 4 states means that some tissues were E, S, VE and U for the same gene.
Transcription start and end
The furthest our base pair locations where transcription starts and stops for this gene, based on hg19
transcript type
What type of RNA is made transcribed from the gene. This was drawn from UCSC's HG19.kgxred table as shown in the methods section
CTAG gene
Genes with a yes are CTAG genes, genes with a no are not CTAG genes. The list of CTAG genes was taken from Ctdatabase as detailed in my methods section
Expression in GM12878
Expression values are taken from GEO dataset GSE30400 and annotated using seqmonk with the base pair locations noted in my table
The units are RPKM (reads per kilobase of transcript per million mapped reads)
Expression in IMR90
Expression values are taken from GEO dataset GSM981249 and annotated using seqmonk with the base pair locations noted in my table
The units are RPKM (reads per kilobase of transcript per million mapped reads)
Expressed in Either Tissue
This column tells whether a gene is expressed in both tissues, lymphoblasts only, fibroblasts only or neither tissue at a level of 0.1 RPKM or higher.
Domain categories
The categories made in my domain analysis. I also separated out the PAR1 genes and left them out of the analysis
Results from other literature
XCI status calls from studies which only examined a small number of genes. The information of which study gave each call is included as a comment at that call.
Lister mCH
XCI status calls from the Lister, et al., 2013 paper. They used mCH (non-CpG methyl cytosine) to call genes as escape or subject in neurons.
Sex differences in expression
Male or female expression bias as found in Mele, et al., 2015. Part of the GTEx pilot project analysis and using multiple tissues
Y homology
Identifies genes which are in the PARs, have Y homologs or Y pseudogenes. From Wilson Sayres and Makova, 2013.
Alternate gene names
Some genes required alternate gene names to be found in order to merge data across multiple studies
Related diseases
A search of NCBIs MedGen database to find genetic diseases related to these genes.
Comments
Various comments about genes such as collapsing down an inverted repeat region or multiple copies of the same gene in a row so that the same gene is not counted multiple times in the analysis.

## Sheet: References
Carrel L, Clemson CM, Dunn JM, Miller AP, Hunt PA, Lawrence JB, et al. X inactivation analysis and DNA methylation studies of the ubiquitin activating enzyme E1 and PCTAIRE-1 genes in human an mouse. Hum Mol Genet. 1996:5:391-401.
Dal Zotto L, Quaderi NA, Elliott R, Lingerfelter PA, Carrel L, Valsecchi V, et al. The mouse Mid1 gene: implications for the pathogenesis of Opitz syndrome and the evolution of the mammalian pseudoautosomal region. Hum Mol Genet. 1998:7:489-99.
D’Esposito M, Ciccodicola A, Gianfrancesco F, Esposito T, Flagiello L, Mazzarella R, et al. A synaptobrevin-like gene in the Xq28 pseudoautosomal region undergoes X inactivation. Nature Genet. 1996:13:227-229.
Ding Z, Ni Y, Timmer SW, Lee BK, Battenhouse A, Louzada S, et al. Quantitative genetics of CTCF binding reveal local sequence effects and different modes of X-chromosome association. PLOS genet. 2014:10:e1004798
Esposito T, Gianfrancesco F, Ciccodicola A, D’Esposito M, Nagaraja R, Mazzarella R, et al. Escape from X inactivation of two new genes associated with DXS6974E and DXS7020E. Genomics. 1997:43:193-90.
Garcia-Villoria J, Gort L, Madrigal I, Fons C, Fernandez C, Navarro-Sastre A, et al.X-inactivation of HSD17B10 revealed by cDNA analysis in two female patients with 17β-hydroxysteroid dehydrogenase 10 deficiency. Eur J Hum Genet. 2010:18:1353-5.
Goodfellow P, Pym B, Mohandas T, Shapiro LJ. The cell surface antigen, MIC2X, escapes X-inactivation. Am J Hum Genet. 1984:36:777-82.
Goto Y, Kimura H. Inactive X chromosome-specific histone H3 modification and CpG hypomethylation flank a chromatin boundary between an X-inactivated and an escape gene. Nucl Acids Res. 2009:37:7416-28.
Imai K, Shimadzu M, Kubota T, Morio T, Matsunaga T, Park Y, et al. Female hyper IgM syndrome type 1 with a chromosomal translocation disrupting CD40LG. Biochim Biophys ACTA. 2006:1762:335-40.
Kutsche R, Brown CJ. Determination of X-chromosome inactivation status using X-linked expressed polymorphisms identified by database searching. Genomics. 2000:65:9-15.
Lister R, Mukamel EA, Nery JR, Urich M, Puddifoot CA, Johnson ND, et al. Global epigenomic reconfiguration during mammalian brain development. Science. 2013:341:1237905.
Lu Q, Wu A, Tesmer L, Ray D, Yousif N, Richardson B. Demethylation of CD40LG on the inactive X in T cells from women with Lupus. J Immunol. 2007:179:6352-8.
Mele M, Ferreira PG, Reverter F, DeLuca DS, Monlong J, Sammeth M, et al. The human transcriptome across tissues and individuals. Science. 2015:348:660-5.
Prakash SK, Van den Veyver IB, Franco B, Volta M, Ballabio A, Zoghbi H. Characterization of a novel chromo domain gene in Xp22.3 with homology to Drosophila msl-3. Genomics. 1999:59:77-84.
Tukiainen T, Pirinen M, Sarin AP, Ladenvall C, Kettunen J, Lehtimaki T, et al. Chromosome X-wide association study identifies loci for fasting insulin and height and evidence for incomplete dosage compensation. PLoS Genet. 2014:10:e1004127.
Stabellini R, Moreira de Mello JC, Hernandes LM, Pereira LV. MAOA and GYG2 are submitted to X chromosome inactivation in human fibroblasts. Epigenetics. 2009:4:388-93.
Shapiro LJ, Mohandas T, Weiss R, Romeo G. Non-inactivation of an X-chromosome locus in man. Science. 1979:15:1224-6.
Tsuchiya KD, Greally JM, Yi Y, Noel KP, Truong JP, Disteche CM. Comparative sequence and X-inactivation analysis of a domain of escape in human Xp11.2 and the conserved sequence in mouse. Genome Res, 2004:14:1275-84.
Wilson Sayres MA, Makova KD. Gene survival and death on the human Y chromosome. Mol Biol Evol. 2013:30:781-7.
Witkop CJ. Partial expression of sex-linked recessive amelogenesis imperfect in females compatible with the Lyon hypothesis. Oral Surg Oral Med Oral Path. 1967:23:174-82.
Yang F, Babak T, Shendure J, Disteche CM. Global survey of escape from X inactivation by RNA-sequencing in mouse. Genome Res. 2010:20:614-22.
